# Supplementary material for: Prospective, randomised, multicentre, open-label trial, designed to evaluate the best timing of closure of the temporary ileostomy (early versus late) in patients who underwent rectal cancer resection and with indication for adjuvant chemotherapy: the STOMAD (STOMa closure before or after ADjuvant therapy) randomised controlled trial
Source: PubMed Central journal article supplement — BMJ Open. 2021 Feb 19;11(2):e044692. doi: 10.1136/bmjopen-2020-044692 (PMC7896613; doi:10.1136/bmjopen-2020-044692), 2021-02-19
Supplement: bmjopen-2020-044692.draft_revisions.pdf [file bmjopen-2020-044692.draft_revisions.pdf]

# BMJ Open

BMJ Open is committed to open peer review. As part of this commitment we make the peer review history of every article we publish publicly available.

When an article is published we post the peer reviewers' comments and the authors' responses online. We also post the versions of the paper that were used during peer review. These are the versions that the peer review comments apply to.

The versions of the paper that follow are the versions that were submitted during the peer review process. They are not the versions of record or the final published versions. They should not be cited or distributed as the published version of this manuscript.

BMJ Open is an open access journal and the full, final, typeset and author-corrected version of record of the manuscript is available on our site with no access controls, subscription charges or pay-per-view fees (<http://bmjopen.bmj.com>).

If you have any questions on BMJ Open's open peer review process please email [info.bmjopen@bmj.com](mailto:info.bmjopen@bmj.com)

# BMJ Open

**A prospective, randomized, multicentre, open-label trial, designed to evaluate the best timing of closure of the temporary ileostomy (early versus late) in patients who underwent rectal cancer resection and with indication for adjuvant chemotherapy. The STOMAD (STOMa closure before or after ADjuvant therapy) randomized controlled trial.**

|                               |                                                                                                                                                                                                                                                                                                                                                                                                                                                                                                                                                                                                                                                                                                                                                                                                                                                                                                                                                                                                                                                                                                                                                                                                                                                                                                                                                                                                                                                                                                                                                                                                                                                                                                                                                                                                                                                                                                                                                                                                                                                                                                     |
|-------------------------------|-----------------------------------------------------------------------------------------------------------------------------------------------------------------------------------------------------------------------------------------------------------------------------------------------------------------------------------------------------------------------------------------------------------------------------------------------------------------------------------------------------------------------------------------------------------------------------------------------------------------------------------------------------------------------------------------------------------------------------------------------------------------------------------------------------------------------------------------------------------------------------------------------------------------------------------------------------------------------------------------------------------------------------------------------------------------------------------------------------------------------------------------------------------------------------------------------------------------------------------------------------------------------------------------------------------------------------------------------------------------------------------------------------------------------------------------------------------------------------------------------------------------------------------------------------------------------------------------------------------------------------------------------------------------------------------------------------------------------------------------------------------------------------------------------------------------------------------------------------------------------------------------------------------------------------------------------------------------------------------------------------------------------------------------------------------------------------------------------------|
| Journal:                      | <i>BMJ Open</i>                                                                                                                                                                                                                                                                                                                                                                                                                                                                                                                                                                                                                                                                                                                                                                                                                                                                                                                                                                                                                                                                                                                                                                                                                                                                                                                                                                                                                                                                                                                                                                                                                                                                                                                                                                                                                                                                                                                                                                                                                                                                                     |
| Manuscript ID                 | bmjopen-2020-044692                                                                                                                                                                                                                                                                                                                                                                                                                                                                                                                                                                                                                                                                                                                                                                                                                                                                                                                                                                                                                                                                                                                                                                                                                                                                                                                                                                                                                                                                                                                                                                                                                                                                                                                                                                                                                                                                                                                                                                                                                                                                                 |
| Article Type:                 | Protocol                                                                                                                                                                                                                                                                                                                                                                                                                                                                                                                                                                                                                                                                                                                                                                                                                                                                                                                                                                                                                                                                                                                                                                                                                                                                                                                                                                                                                                                                                                                                                                                                                                                                                                                                                                                                                                                                                                                                                                                                                                                                                            |
| Date Submitted by the Author: | 09-Sep-2020                                                                                                                                                                                                                                                                                                                                                                                                                                                                                                                                                                                                                                                                                                                                                                                                                                                                                                                                                                                                                                                                                                                                                                                                                                                                                                                                                                                                                                                                                                                                                                                                                                                                                                                                                                                                                                                                                                                                                                                                                                                                                         |
| Complete List of Authors:     | <p>Massucco, Paolo; Azienda Ospedaliera Ordine Mauriziano di Torino, General and Oncological Surgery<br/> Fontana, Andrea; Azienda Ospedaliera Ordine Mauriziano di Torino, General and Oncological Surgery<br/> Mineccia, Michela; Azienda Ospedaliera Ordine Mauriziano di Torino, General and Oncological Surgery<br/> Perotti, Serena; Azienda Ospedaliera Ordine Mauriziano di Torino, General and Oncological Surgery<br/> Ciccone, Giovannino; Azienda Ospedaliero Universitaria Citta della Salute e della Scienza di Torino, Clinical Epidemiology Unit<br/> Galassi, Claudia; Azienda Ospedaliero Universitaria Citta della Salute e della Scienza di Torino, Clinical Epidemiology Unit<br/> Giuffrida, Maria Carmela; Azienda Ospedaliera S Croce e Carle Cuneo, Department of Surgery<br/> Marino, D; Azienda Ospedaliera Ordine Mauriziano di Torino, Department of Oncology<br/> Monsellato, Igor; Azienda Ospedaliera Nazionale SS Antonio e Biagio e C Arrigo, Department of Surgery<br/> Paris, Myriam Katja; Ospedale degli Infermi, Department of Oncology<br/> Perinotti, Roberto; Ospedale degli Infermi, Department of Surgery<br/> Racca, Patrizia; Azienda Ospedaliero Universitaria Citta della Salute e della Scienza di Torino, Colorectal Cancer Unit<br/> Monagheddu, Chiara; Azienda Ospedaliero Universitaria Citta della Salute e della Scienza di Torino, Clinical Epidemiology Unit<br/> Saccona, Fabio; Azienda Ospedaliero Universitaria Citta della Salute e della Scienza di Torino, Clinical Epidemiology Unit<br/> Ponte, Elisa; Ospedale Regionale Umberto Parini, Department of Surgery<br/> Mistrangelo, Massimiliano; Azienda Ospedaliero Universitaria Citta della Salute e della Scienza di Torino, Department of Surgical Science, Turin University<br/> Santarelli, Mauro; Azienda Ospedaliero Universitaria Citta della Salute e della Scienza di Torino, Department of General and Emergency Surgery<br/> Tomaselli, Francesco; Ospedale Martini, Department of Surgery<br/> Reddavid, Rossella; Azienda Ospedaliero Universitaria San Luigi</p> |

|           |                                                                                                                                                                                                                                                                                                                                                                                                                                                                                                                                                                                                                                                                                                                                                                                                                                                                                                                                                                                                                                                                                                                                                                                                                                                                                                                                                                                                                                                                                                                                                                                                                                                                                                                                                                                                                                                                                                                                                                                                                                                                                                |
|-----------|------------------------------------------------------------------------------------------------------------------------------------------------------------------------------------------------------------------------------------------------------------------------------------------------------------------------------------------------------------------------------------------------------------------------------------------------------------------------------------------------------------------------------------------------------------------------------------------------------------------------------------------------------------------------------------------------------------------------------------------------------------------------------------------------------------------------------------------------------------------------------------------------------------------------------------------------------------------------------------------------------------------------------------------------------------------------------------------------------------------------------------------------------------------------------------------------------------------------------------------------------------------------------------------------------------------------------------------------------------------------------------------------------------------------------------------------------------------------------------------------------------------------------------------------------------------------------------------------------------------------------------------------------------------------------------------------------------------------------------------------------------------------------------------------------------------------------------------------------------------------------------------------------------------------------------------------------------------------------------------------------------------------------------------------------------------------------------------------|
|           | <p>Gonzaga, Department of Surgical Oncology and Digestive Surgery, Turin University</p> <p>Birolo, Simone; Ospedale degli Infermi, Department of Surgery</p> <p>Calabrò, Marcello; Ospedale Edoardo Agnelli di Pinerolo, Department of Surgery</p> <p>Pipitone, Nicoletta; Ospedale Edoardo Agnelli di Pinerolo, Department of Surgery</p> <p>Panier Suffat, Luca; Ospedale di Ivrea, Department of Surgery</p> <p>Carrera, Monica; Ospedale di Cirie, Department of Surgery</p> <p>Potente, Francesco; Azienda Sanitaria Locale TO5, Ospedale Santa Croce, Department of Surgery</p> <p>Brunetti, Marco; Ospedale SS Annunziata di Savigliano, Department of Surgery</p> <p>Rimonda, Roberto; Azienda Sanitaria Locale CN1, Ospedale Regina Montis, Department of Surgery</p> <p>Adamo, Vincenzo; Ospedale San Lazzaro Alba, Department of Surgery</p> <p>Piscioneri, Domenico; Azienda Ospedaliera Nazionale SS Antonio e Biagio e C Arrigo, Department of Surgery</p> <p>Cravero, Francesca; Ospedale Santo Spirito, Department of Surgery</p> <p>Serventi, Alberto; Azienda Sanitaria Locale Alessandria, Ospedale Mons. Galliano, Department of Surgery</p> <p>Giaminardi, Elisa; Ospedale San Giacomo di Novi Ligure, Department of Surgery</p> <p>Mazza, Luca; Ospedale Cardinal Massaia di Asti, Department of Surgery</p> <p>Bellora, Paolo; Azienda Ospedaliera Maggiore della Carita, Department of Surgery, Eastern Piedmont University</p> <p>Colli, Fabio; Azienda Ospedaliera Maggiore della Carita, Department of Surgery</p> <p>De Rosa, Clemente; Presidio Ospedaliero Sant'Andrea di Vercelli, Department of Surgery</p> <p>Battafarano, Francesco; Azienda Sanitaria Locale di Verbanio Cusio e Ossola, Ospedale S. Biagio, Department of Surgery</p> <p>Trapani, Renza; Ospedale Castelli Verbania, Department of Surgery</p> <p>Mellano, Alfredo; Candiolo Cancer Institute, Colorectal Surgical Unit</p> <p>Gibin, Enrico; Presidio Sanitario Ospedale Cottolengo, Department of Surgery</p> <p>Bellomo, Paola; Presidio Sanitario Gradenigo, Department of Surgery</p> |
| Keywords: | <p>Quality in health care &lt; HEALTH SERVICES ADMINISTRATION &amp; MANAGEMENT, Gastrointestinal tumours &lt; ONCOLOGY, Colorectal surgery &lt; SURGERY, CHEMOTHERAPY</p>                                                                                                                                                                                                                                                                                                                                                                                                                                                                                                                                                                                                                                                                                                                                                                                                                                                                                                                                                                                                                                                                                                                                                                                                                                                                                                                                                                                                                                                                                                                                                                                                                                                                                                                                                                                                                                                                                                                      |
|           |                                                                                                                                                                                                                                                                                                                                                                                                                                                                                                                                                                                                                                                                                                                                                                                                                                                                                                                                                                                                                                                                                                                                                                                                                                                                                                                                                                                                                                                                                                                                                                                                                                                                                                                                                                                                                                                                                                                                                                                                                                                                                                |

SCHOLARONE™  
Manuscripts

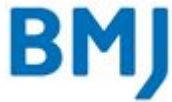

I, the Submitting Author has the right to grant and does grant on behalf of all authors of the Work (as defined in the below author licence), an exclusive licence and/or a non-exclusive licence for contributions from authors who are: i) UK Crown employees; ii) where BMJ has agreed a CC-BY licence shall apply, and/or iii) in accordance with the terms applicable for US Federal Government officers or employees acting as part of their official duties; on a worldwide, perpetual, irrevocable, royalty-free basis to BMJ Publishing Group Ltd ("BMJ") its licensees and where the relevant Journal is co-owned by BMJ to the co-owners of the Journal, to publish the Work in this journal and any other BMJ products and to exploit all rights, as set out in our [licence](#).

The Submitting Author accepts and understands that any supply made under these terms is made by BMJ to the Submitting Author unless you are acting as an employee on behalf of your employer or a postgraduate student of an affiliated institution which is paying any applicable article publishing charge ("APC") for Open Access articles. Where the Submitting Author wishes to make the Work available on an Open Access basis (and intends to pay the relevant APC), the terms of reuse of such Open Access shall be governed by a Creative Commons licence – details of these licences and which [Creative Commons](#) licence will apply to this Work are set out in our licence referred to above.

Other than as permitted in any relevant BMJ Author's Self Archiving Policies, I confirm this Work has not been accepted for publication elsewhere, is not being considered for publication elsewhere and does not duplicate material already published. I confirm all authors consent to publication of this Work and authorise the granting of this licence.

1  
2  
3 **Title page:**  
4

5 ***A prospective, randomized, multicentre, open-label trial, designed to evaluate the best timing of***  
6 ***closure of the temporary ileostomy (early versus late) in patients who underwent rectal cancer***  
7 ***resection and with indication for adjuvant chemotherapy. The STOMAD (STOMa closure before or***  
8 ***after ADjuvant therapy) randomized controlled trial.***  
9

10  
11 Paolo Massucco MD<sup>Pl 1\*</sup>, Andrea Fontana MD<sup>1</sup>, Michela Mineccia MD<sup>1</sup>, Serena Perotti MD<sup>1</sup>,  
12 Giovannino Ciccone MD<sup>2</sup>, Claudia Galassi MD<sup>2</sup>, Maria Carmela Giuffrida MD<sup>3</sup>, Donatella Marino  
13 MD<sup>4</sup>, Igor Monsellato MD<sup>5</sup>, Myriam Katja Paris MD<sup>6</sup>, Roberto Perinotti MD<sup>7</sup>, Patrizia Racca MD<sup>8</sup>,  
14 and the STOMAD trial group on behalf of Rete Oncologica Piemonte e Valle d'Aosta (Oncology  
15 Network of Piedmont and Aosta Valley – Italy).  
16

17 Full list of authors information is available at the end of the article.  
18

19  
20 \* Correspondence to: [pmassucco@mauriziano.it](mailto:pmassucco@mauriziano.it)

21 *P. Massucco, MD - General and Oncological Surgery, AO Ordine Mauriziano, Umberto I Hospital,*  
22 *Largo Filippo Turati, 62, 10128 Turin (Italy) – tel. +290115082734.*  
23

24 *Orcid ID - Paolo Massucco <https://orcid.org/0000-0003-1620-0464>.*  
25

26 Word count: 2671  
27  
28  
29  
30  
31  
32  
33  
34  
35  
36  
37  
38  
39  
40  
41  
42  
43  
44  
45  
46  
47  
48  
49  
50  
51  
52  
53  
54  
55  
56  
57  
58  
59  
60

## Abstract:

**Introduction:** Temporary ileostomy is a valuable aid in reducing the severity of complications related to rectal cancer surgery. However, it is still unclear what is the best timing of its closure in relation to the feasibility of an adjuvant treatment, especially considering patient-reported outcomes and health system costs. The aim of the study is to compare the results of an early versus late closure strategy in patients with indication to adjuvant chemotherapy after resection for rectal cancer.

**Methods and analysis:** This is a prospective multicentre randomized trial, sponsored by *Rete Oncologica Piemonte e Valle d'Aosta* (Oncology Network of Piedmont and Aosta Valley - Italy). Patients undergone to rectal cancer surgery with temporary ileostomy, aged >18 years, without evidence of anastomotic leak and with indication to adjuvant chemotherapy will be enrolled in 28 Network centres. An early closure strategy (between 30 and 40 days from rectal surgery) will be compared to a late one (after the end of adjuvant therapy). Primary endpoint will be the compliance to adjuvant chemotherapy with and without ileostomy. Complications associated with stoma closure as well as quality of life, costs, and oncological outcomes will be assessed as secondary endpoints.

**Ethics and dissemination:** The trial will engage the Network professional teams in a common effort to improve the treatment of rectal cancer by ensuring the best results in relation to the most correct use of resources. It will take into consideration both the patients' point of view (patient-reported outcome) and the health system perspective (costs analysis). The study has been approved by the Ethical Review Board of *Città della Salute e della Scienza* Hospital in Turin (Italy). The results of the study will be disseminated by the Network website, medical conferences and peer-reviewed scientific journals.

**Trial registration:** ClinicalTrials ([www.clinicaltrials.gov](http://www.clinicaltrials.gov)) NCT04372992

**Keywords:** rectal cancer; temporary ileostomy; early closure; late closure; postoperative morbidity; adjuvant chemotherapy; randomized controlled trial.

## Strengths and limitations of the study:

- STOMAD is a randomized trial aimed at improving the quality of life of patients with a temporary stoma while optimizing health system costs (value-based health care). It may contribute to boost interest in healthcare delivery research.
- The study will be conducted in the context of an oncology network that encompasses all the centres for the treatment of rectal cancer in the north-western area of Italy. The results of the experimentation could have an immediate impact on treatment protocols of the network centres and will have a high external validity given the large multicentric territorial setting.
- The results will be analysed taking into account the point of view of patients (patient-reported outcome analysis).
- The principal weakness of the study is the highly selected nature of the patient population. The strict inclusion criteria might slow the accrual rate.

## INTRODUCTION

The temporary ileostomy is effective in reducing the severity of anastomotic complications in anterior resections for tumours of the rectum at risk of dehiscence and is therefore widely used, particularly after radiotherapy treatment. (1) In patients with indication for adjuvant chemotherapy, current practice consists of closing the stoma after the end of treatment.

The prolonged presence of the stoma can however favour the onset of stoma-related complications, such as prolapse, parastomal hernia, mechanical ileus, high-flow dehydration, and damage to kidney function. Ostomy-related complications may require unscheduled hospitalizations and result in increased costs. (2) In addition, the presence of the stoma impacts on patients' quality of life, causing alteration of the body image and imposing changes in the daily routine, lifestyle, and sexual sphere. (3, 4) Therefore, early closure of the ileostomy has been proposed in patients without signs of postoperative fistula.

The early closure (within one month of surgery) of the temporary ileostomy resulted not inferior to late closure (over 12 weeks) in 2 randomized studies that evaluated postoperative complications as an outcome. (5, 6) Early closure saves days of life with ileostomy for the patient and costs related to ostomy care for the health system and could represent the most desirable and convenient choice. (7) It was also associated with better long-term functional results in a secondary analysis of a randomized study. (8) However, in patients with indication for adjuvant therapy, it is not known what the best timing is for closing the stoma (before the start, during or at the end of the treatment) in terms of therapy tolerability, quality of life and overall costs. (9)

Both a start date delayed more than 8 weeks from surgery (10) and a received dose <70% of that planned (11) have been reported to reduce the effectiveness of adjuvant therapy in colorectal cancer patients. The presence of a stoma or the consequences of its early closure may interfere with an optimal delivery of chemotherapy. A recent multicentre retrospective study reported an increase

1  
2  
3 in gastrointestinal toxicity in chemo-treated patients with stoma, with significant reduction in  
4  
5 treatment compliance. (12) On the other hand, early closure of the stoma could reveal an anterior  
6  
7 resection syndrome (LARS) before chemotherapy, with a potential negative impact on the  
8  
9 tolerability of the treatment itself, (13) or delay its initiation due to postoperative complications.  
10  
11

12  
13 (14)

14  
15 This randomized study aims to identify the best timing for the stoma closure in relation to adjuvant  
16  
17 therapy in terms of compliance to chemotherapy, complications, costs and quality of life (QoL).  
18  
19

## 20 21 22 23 **METHODS AND ANALYSIS**

24  
25  
26 STOMAD is a multicentre open-label randomized phase III trial designed to evaluate the best timing  
27  
28 of the closure of temporary ileostomy in patients operated on for rectal cancer and with indication  
29  
30 for adjuvant chemotherapy.  
31  
32

### 33 34 **Objectives**

#### 35 36 1. Primary objective

- 37  
38 • To compare the compliance with adjuvant therapy between early and late closure of  
39  
40 temporary ileostomy.  
41

42  
43 The compliance with adjuvant chemotherapy in relation to the timing of ileostomy closure  
44  
45 (before the start or after the end of treatment) will be assessed considering any therapeutic  
46  
47 delay or dose reduction compared to the initially planned.  
48  
49

#### 50 51 2. Secondary objectives

52  
53 To compare patients with early and late closure of temporary ileostomy in terms of:

- 54  
55 • Surgical morbidity
- 56  
57 • Chemotherapy toxicity
- 58  
59 • Patient-reported quality of life
- 60



- Costs
- Progression free survival (PFS)
- Overall survival (OS)

### Target population and setting

Patients undergone to rectal resection (+/- neoadjuvant therapy) for cancer with protective ileostomy and candidates for adjuvant chemotherapy in the Centres for the treatment of colorectal neoplasms recognized by *Rete Oncologica Piemonte e Valle d'Aosta*.

The list of participating centres is reported in Table 1.

**Table 1. List of participating centres**

| Local PI           | Local trial manager                    | Centre                                                                                      | Location                          |
|--------------------|----------------------------------------|---------------------------------------------------------------------------------------------|-----------------------------------|
| Paolo Millo        | Elisa Ponte                            | AUSL Aosta – Surgical Unit – Parini Hospital                                                | Aosta                             |
| Mario Morino       | Massimiliano Mistrangelo               | AOU Città Salute e Scienza – Academic Surgical Unit – Molinette Hospital                    | Torino                            |
| Paolo De Paolis    | Mauro Santarelli                       | AOU Città Salute e Scienza – Surgical Unit – Molinette Hospital                             | Torino                            |
| Alessandro Ferrero | Paolo Massucco                         | AO Ordine Mauriziano – Surgical Unit – Umberto I Hospital (Coordinating centre)             | Torino                            |
| Maurizio Degiuli   | Rossella Reddavid                      | AOU S. Luigi Gonzaga – Academic Surgical Unit – S. Luigi Hospital                           | Orbassano (TO)                    |
| Roberto Saracco    | Francesco Tomaselli                    | ASL Città Torino – Surgical Unit – Martini Hospital                                         | Torino                            |
| Mauro Garino       | Simone Birolo                          | ASL TO3 – Surgical Unit – Infermi Hospital                                                  | Rivoli (TO)                       |
| Andrea Muratore    | Marcello Calabrò<br>Nicoletta Pipitone | ASL TO3 – Surgical Unit – Agnelli Hospital                                                  | Pinerolo (TO)                     |
| Lodovico Rosato    | Luca Panier Suffat                     | ASL TO4 – Surgical Unit – Civile Hospital                                                   | Ivrea (TO)                        |
| Eraldo Personnetaz | Monica Carrera                         | ASL TO4 – Surgical Unit – Ciriè Hospital                                                    | Ciriè (TO)                        |
| Pietro Cumbo       | Francesco Potente                      | ASL TO5 – Surgical Unit – S. Croce Hospital                                                 | Moncalieri (TO)                   |
| Felice Borghi      | Maria Carmela Giuffrida                | AO S. Croce e Carle – Surgical Unit – S. Croce Hospital                                     | Cuneo                             |
| Franco Bertolino   | Marco Brunetti                         | ASL CN1 – Surgical Unit – SS. Annunziata Hospital                                           | Savigliano (CN)                   |
| Andrea Gattolin    | Roberto Rimonda                        | ASL CN1 – Surgical Unit – Regina Montis Regalis Hospital                                    | Mondovì (CN)                      |
| Marco Calgaro      | Vincenzo Adamo                         | ASL CN2 – Surgical Unit – S. Lazzaro Hospital                                               | Alba (CN)                         |
| Fabio Priora       | Igor Monsellato<br>Domenico Piscioneri | AO SS. Antonio e Biagio e Cesare Arrigo - Surgical Unit – SS. Antonio e Biagio Hospital     | Alessandria                       |
| Marco Amisano      | Francesco Cravero                      | ASL AL – Surgical Unit – S. Spirito Hospital                                                | Casale Monf.to (AL)               |
| Alberto Serventi   | Alberto Serventi                       | ASL AL – Surgical Unit – Mons. Galliano Hospital                                            | Acqui Terme (AL)                  |
| Carmine Di Somma   | Eliana Giaminardi                      | ASL AL – Surgical Unit – S. Giacomo Hospital                                                | Novi Ligure (AL)                  |
| Vincenzo Sorisio   | Luca Mazza                             | ASL AT – Surgical Unit – Cardinal Massaia Hospital                                          | Asti                              |
| Sergio Gentilli    | Paolo Bellora                          | AOU Maggiore Carità – Academic Surgical Unit – Maggiore Hospital                            | Novara                            |
| Raffaele Romito    | Fabio Colli                            | AOU Maggiore Carità – Surgical Unit – Maggiore Hospital                                     | Novara                            |
| Roberto Polastri   | Roderto Perinotti                      | ASL BI – Surgical Unit – Infermi Hospital                                                   | Biella                            |
| Silvio Testa       | Clemente De Rosa                       | ASL VC – Surgical Unit – S. Andrea Hospital                                                 | Vercelli                          |
| Sandro Zonta       | Francesco Battafarano<br>Renza Trapani | ASL VCO – Surgical Unit – S. Biagio Hospital<br>ASL VCO – Surgical Unit – Castelli Hospital | Domodossola (VB)<br>Verbania (VB) |
| Dario Ribero       | Alfredo Mellano                        | FPO – Colorectal Surgical Unit – IRCCS                                                      | Candiolo (TO)                     |
| Renzo Leli         | Paola Bellomo                          | Surgical Unit – Humanitas Gradenigo Hospital                                                | Torino                            |
| Carlo Bima         | Enrico Gibin                           | Surgical Unit – Cottolengo Hospital                                                         | Torino                            |

## Enrolment

### Inclusion criteria

- Patients undergone to radical intestinal resection (R0) for rectal neoplasia with protective ileostomy.
- Age  $\geq$  18 years.
- Absence of fistula (enema and/or endoscopy)
- Indication to adjuvant chemotherapy
- Informed consent

### Exclusion criteria

- ASA  $>3$
- UICC stage IV
- ECOG Performance Status  $\geq 2$
- Urgently closed stoma (before randomization) for stoma-related complications
- Severe and non-controlled systemic, oncologic, or infectious disease

Before enrolment, the patient shall not show signs of ongoing complications. The integrity of the colorectal anastomosis will be confirmed with an enema and/or endoscopy according to local standards starting 15 days after surgery.

The presence of a discontinuation of the anastomotic rhyme in endoscopy or of a spreading of any entity of the contrast medium on the enema will represent an exclusion criterion. All patients will simultaneously perform an oncological evaluation to establish the indication for adjuvant therapy in the presence of the definitive histological examination. Patients without signs of anastomotic complications and with indication for adjuvant therapy will be enrolled for study by the local investigators. Enrolment and randomization must take place within 21 days of the intervention.

1  
2  
3 The subjects who are eligible for the study, after the informed consent has been signed, will be  
4 stratified by previous neoadjuvant treatment (yes or no) and by the proposed adjuvant  
5 chemotherapy scheme (with or without platinum derivatives), and then randomized to one of the  
6 following arms:  
7  
8  
9

10  
11  
12 - Arm A (experimental): closure of the stoma between 30 and 40 days after surgery on the rectum,  
13 before starting adjuvant therapy.  
14  
15

16  
17 - Arm B (standard): closure of the stoma starting from 15 days and within 60 days from the end of  
18 the adjuvant therapy. The anastomosis instrumental evaluation will be repeated after the end of  
19 chemotherapy in this group.  
20  
21  
22  
23

## 24 25 **Endpoint definition**

### 26 27 1. Primary endpoint.

28  
29 Proportion of patients with adequate compliance with adjuvant treatment.

30  
31 Compliance with adjuvant therapy will be considered adequate if both of the following  
32 criteria are met:  
33  
34

- 35  
36 • start of adjuvant therapy within the 70th day ( $\leq 10$  weeks) after surgery on the rectum;
- 37  
38 and
- 39  
40 • total cumulative dose delivered, compared to the theoretical planned,  $\geq 70\%$ .

41  
42 Failure to adhere to at least 1 of the two criteria will correspond to a failure (inadequate  
43 compliance). Patients with missing or non-performed assessment of compliance for any  
44 reason will also be considered unsuccessful adherence.  
45  
46  
47

### 48 49 2. Secondary endpoints.

- 50  
51 • Morbidity. Incidence of complications related to the presence or to the closure of the  
52 ileostomy, during hospitalization or after discharge, using the Clavien-Dindo classification.

53  
54 Individual patient events, hospitalizations and reoperations will be recorded.  
55  
56  
57  
58  
59  
60

- Chemotherapy toxicity. All adverse events according to CTCAE version 5.0 classification will be considered.
- QoL. Patient-reported quality of life will be measured at the baseline and at defined time points using validated questionnaires (EORTC C30 and CR29, EQ5D).
- Costs. The costs related to hospitalization, outpatient visits, ostomy care supplies and the management of complications and toxicity will be assessed.
- Progression free survival (PFS), defined as the time elapsed between the randomization date and the date of progression/death for any cause or the latest follow up available.
- Overall survival (OS), defined as the time elapsed between the randomization date and the date of death for any cause or the latest follow up available

Patients will be followed for the duration of the study, regardless of the clinical course, and will conclude the active follow-up with a final evaluation 12 months after randomization in both study arms. A longer follow-up, based only on routinely recorded data, will be conducted to assess long term overall survival. Enrolment is expected to start in September 2020.

The study flow diagram is depicted in Figure 1.

### **Surgical technique and medical therapy**

Hospitalization will normally take place the day before or the morning of surgery. Antibiotic-prophylaxis (usually short-term with cefazoline within half an hour after skin incision) and thromboembolic prophylaxis will be performed according to national guidelines.

The stoma closure will be performed manually or mechanically according to the surgeon's judgment.

The suture of the skin incision will be linear or purse-string according to the local standards.

The postoperative management will be based on the ERAS strategy (early feeding and mobilization).

Discharge criteria will be passage of gas, adequate oral feeding, and good pain control.

1  
2  
3 Adjuvant chemotherapy will be administered, in terms of indications, drugs and schedules,  
4  
5 according to the national guidelines (AIOM) and according to the consensus documents of the  
6  
7 Colorectal Study Group of the Oncology Network ([http://www.reteoncologica.it/area-](http://www.reteoncologica.it/area-operatori/gruppi-per-patologie/raccomandazioni-di-rete)  
8  
9 [operatori/gruppi-per-patologie/raccomandazioni-di-rete](http://www.reteoncologica.it/area-operatori/gruppi-per-patologie/raccomandazioni-di-rete)).  
10  
11

12  
13 The ideal temporal target for the start of chemotherapy will be within 8 weeks of surgery on the  
14  
15 rectum; the maximum time within 10 weeks. Randomized patients starting after this term are still  
16  
17 followed up and evaluated until the end of follow-up for the evaluation of the other endpoints.  
18  
19

## 20 **Endpoints assessment and follow-up**

### 21 1. Morbidity

22  
23 Complications related to stoma closure surgery, which occurred both during and after  
24  
25 hospitalization, will be recorded according to the Clavien-Dindo classification. Their overall weight  
26  
27 per patient will be calculated through the CCI. Management problems and complications from the  
28  
29 stoma presence will also be recorded. All reinterventions and hospitalizations during the study  
30  
31 period will be captured.  
32  
33  
34  
35

### 36 2. Adjuvant therapy

37  
38 Chemotherapy toxicity will be evaluated according to the CTC-EORTC. Prophylaxis and treatment of  
39  
40 side effects and dose reductions will be applied according to international standards (NCI-CTCAE  
41  
42 criteria). Starting date of the treatment, dose reductions and therapeutic scheme variations,  
43  
44 suspensions or interruptions will be recorded. In relation to the total dose and the total number of  
45  
46 programmed cycles, the percentage of completeness of the adjuvant therapy will be calculated.  
47  
48  
49  
50  
51 Grade and type of adjuvant therapy toxicity will be recorded for each patient.  
52  
53

### 54 3. QoL

1  
2  
3 Quality of life will be measured using the EORTC C30, CR29 and EQ5D validated questionnaires. The  
4  
5 questionnaires will be administered, in both arms, upon enrolment (baseline), at the beginning of  
6  
7 the 4th cycle of adjuvant therapy and at 12 months after the intervention on rectal cancer.  
8  
9

10 The LARS score will be used to evaluate intestinal and sphincter function at 12 months after the  
11  
12 rectal intervention in both arms (in the control group if ostomy closed since at least 2 months).  
13  
14

#### 15 4. Costs

16  
17 The costs will be estimated considering the days of hospitalization related to the closure of the  
18  
19 stoma, the treatment of complications or toxicity, the outpatient visits during the study period and  
20  
21 the amount of supplies for stoma care. Regional averages costs will be used as the basic cost unit.  
22  
23  
24

### 25 **Statistical considerations**

#### 26 1. Sample size

27  
28 The sample size was calculated in relation to the main objective. Based on the available literature  
29  
30 data, the null hypothesis (proportion of patients with adequate compliance to the adjuvant  
31  
32 treatment in patients with closure of the stoma after treatment) is equal to 0.70. The alternative  
33  
34 hypothesis is an increase in the proportion up to 0.85, with an absolute increase of 0.15. This  
35  
36 increase is considered clinically relevant. With a two-tailed alpha error of 0.05 and a power of 0.80,  
37  
38 the sample size required is at least 242 patients (121 for each treatment arm). Taking into account  
39  
40 a maximum drop-out rate of approximately 10%, the total number of patients enrolled and  
41  
42 randomized will be 270. The estimated study duration is 36 months.  
43  
44  
45  
46  
47  
48

#### 49 2. Randomization

50  
51 The randomization list, stratified by neoadjuvant therapy (yes/no) and by type of planned adjuvant  
52  
53 chemotherapy (fluoropyrimidine +/- platinum derivatives) will be generated by the Clinical  
54  
55 Epidemiology Unit of *Città della Salute e della Scienza* University Hospital in Turin, using a block  
56  
57 procedure of variable length in random order, completely concealed to clinicians. The 1:1  
58  
59  
60

1  
2  
3 randomization will be done online. After entering the inclusion/exclusion criteria and the  
4  
5 stratification variables into the database, the patient will be randomized and registered in arm A or  
6  
7  
8 B. The computerized randomization system will be accessible continuously.  
9

### 10 3. Analysis

11  
12 The principal analyses will be carried out on all subjects randomized according to the assigned  
13  
14 treatment arm (intention to treat principle). The demographic and baseline characteristics will be  
15  
16 described for the whole study population and for each treatment arm. Discrete variables will be  
17  
18 summarized by frequencies and percentages. The continuous variables will be summarized with the  
19  
20 use of standard measures of central tendency and dispersion (mean and standard deviation or  
21  
22 median deviation and interquartile range). The analysis of the primary endpoint will be based on  
23  
24 the comparison of treatment compliance between the two arms by means of a stratified chi-square  
25  
26 test. As a sensitivity analysis, further potential confounders detected at the baseline will be included  
27  
28 in a logistic regression model. OS and PFS, calculated from the randomization date, will be assessed  
29  
30 with the Kaplan-Meier method and the differences in survival (overall and disease-free) will be  
31  
32 tested using the stratified Log-rank test. The Hazard Ratios (HR), adjusted for the stratification  
33  
34 criteria and the main prognostic factors, and the relative confidence intervals (95% CI) will be  
35  
36 estimated using the Cox model. Planned subgroup analyses will be carried out for the two  
37  
38 stratification factors of the randomization (neoadjuvant treatment and adjuvant chemotherapy)  
39  
40 and by age (divided into 3 classes according to the tertiles). The incidence of individual adverse  
41  
42 events during hospitalization will be compared using the chi square test or the exact Fischer test, as  
43  
44 appropriate. The comparison on the quality of life will be evaluated by comparing the average score  
45  
46 between the two groups with the Student's T test (or with a non-parametric test, if necessary) and  
47  
48 with generalized linear mixed model to take into account the repeated measurements over time on  
49  
50 the same subjects. Per protocol analyses will be performed for exploratory purposes.  
51  
52  
53  
54  
55  
56  
57  
58  
59  
60

### Data collection

The data will be collected in each participating centre by filling in an electronic CRF (eCRF). A local study manager will be identified for each participating centre. The completeness and congruity of the data will be checked periodically by a central study monitor and overviewed the study's Steering Committee. The central monitor and Steering Committee will refer to the local managers for any request for clarification.

### ETHICS AND DISSEMINATION

The *Rete Oncologica Piemonte e Valle d'Aosta* is a multidisciplinary organization that includes specialists involved in the treatment of cancer disease in the north-western territory of Italy. The aim of the Oncology Network is to reduce the variability of treatments, guarantee uniform access to and improve the quality of cancer care. To this end, the Network issues recommendations, drafted through a peer review process by its members, and defines the criteria for the designation as referral centres for cancer specific procedures.

STOMAD is a non-profit study conducted within the Network centres and is part of the research branch aimed at improving the healthcare delivery system. It is proposed to investigate which is the best adjuvant treatment delivery strategy in relation to the presence of the stoma for patients operated on for rectal cancer, taking into consideration both the patient's point of view (patients reported outcome) and the health system perspective (costs analysis).

The study will be conducted according to the principles of the Helsinki Declaration and the ICH Guideline for Good Clinical Practice. It will be approved by the reference Ethics Committee of each participating centre. Each enrolled patient must express a written consent. Consent can be revoked at any time. Patients data will be collected on an existing online platform created by the Clinical Epidemiology Unit of the main centre in the region, which will also be responsible for all statistical



1  
2  
3 analyses. The data collected for the study will be processed in accordance with current national  
4  
5 legislation (Personal Data Protection Code). The trial Steering Committee may request the  
6  
7 premature termination of the study in case of adverse events with severity and frequency  
8  
9 significantly higher than expected or if the primary end point in the experimental group is  
10  
11 significantly worse than the control group before the end of the study. For these evaluations, the  
12  
13 Steering Committee will not use pre-defined statistical criteria (statistical stopping rules) but will  
14  
15 base the decision on a careful quantitative and qualitative evaluation of the events that will be  
16  
17 discussed in scheduled meetings.  
18  
19

20  
21  
22 This trial will engage the Network professional teams in a common effort to improve the treatment  
23  
24 of rectal cancer by ensuring the best results in relation to the most correct use of resources (value-  
25  
26 based health care). Other positive effects could be the strengthening of collaboration relationships  
27  
28 between the Network centres and the definition of a common platform for future Network research.  
29  
30 The results of this study will be presented at national and international meetings and reported in  
31  
32 the Network website. A manuscript with the final results will be submitted for publication in a peer-  
33  
34 reviewed journal.  
35  
36  
37  
38  
39  
40  
41  
42  
43  
44  
45  
46  
47  
48  
49  
50  
51  
52  
53  
54  
55  
56  
57  
58  
59  
60

1  
2  
3  
4  
5  
6 **Abbreviations:**

7 **AIOM:** Associazione Italiana Oncologia Medica

8 **ERAS:** Enhanced Recovery After Surgery protocol

9 **ASA:** American Society of Anesthesiologists

10 **ECOG PS:** Eastern Cooperative Oncology Group – Performance Status

11 **UICC:** Union for International Cancer Control

12 **CCI:** Comprehensive Complication Index

13 **CTC-EORTC:** Common Toxicity Criteria – European Organization for Research and Treatment of  
14 Cancer

15 **NCI-CTCAE:** National Cancer Institute – Common Terminology Criteria for Adverse Events

16 **OS:** Overall survival

17 **PFS:** Progression Free Survival

18 **QoL:** Quality of Life

19 **LARS:** Low Anterior Resection Syndrome

20 **e-CRF:** electronic Case Report Form

21 **ICH:** International Council for Harmonization of Technical Requirements for Registration of  
22 Pharmaceuticals for Human Use

23  
24  
25  
26  
27  
28  
29 **Figure legend:**

30  
31 **Figure 1. Study flow diagram**  
32  
33  
34  
35  
36  
37  
38  
39  
40  
41  
42  
43  
44  
45  
46  
47  
48  
49  
50  
51  
52  
53  
54  
55  
56  
57  
58  
59  
60

## REFERENCES

1. Montedori A, Cirocchi R, Farinella E, et al. Covering ileo- or colostomy in anterior resection for rectal carcinoma. *Cochrane Database Syst Rev*. 2010 May; 12(5).
2. Malik T, Lee MJ, Harikrishnan AB. The incidence of stoma related morbidity - a systematic review of randomised controlled trials. *Ann R Coll Surg Engl*. 2018 Sep; 100(7):501-508.
3. Brown H, Randle J. Living with a stoma: a review of the literature. *J Clin Nurs* 2005; 14:74-81.
4. Herrle F, Sandra-Petrescu F, Weiss C, Post S, Runkel N, Kienle P. Quality of Life and Timing of Stoma Closure in Patients With Rectal Cancer Undergoing Low Anterior Resection With Diverting Stoma: A Multicenter Longitudinal Observational Study. *Dis Colon Rectum*. 2016 Apr; 59(4):281-90.
5. Alves A, Panis Y, Lelong B, Dousset B, Benoist S, Vicaut E. Randomized clinical trial of early versus delayed temporary stoma closure after proctectomy. *Br J Surg*. 2008 Jun; 95(6):693-8.
6. Danielsen AK, Park J, Jansen JE, Bock D, Skullman S, Wedin A, Marinez AC, Haglind E, Angenete E, Rosenberg J, Haglind E, Angenete E, Rosenberg J. Early Closure of a Temporary Ileostomy in Patients With Rectal Cancer: A Multicenter Randomized Controlled Trial. *Ann Surg*. 2017 Feb; 265(2):284-290.
7. Park J, Angenete E, Bock D, Correa-Marinez A, Danielsen AK, Gehrman J, Haglind E, Jansen JE, Skullman S, Wedin A, Rosenberg J. Cost analysis in a randomized trial of early closure of a temporary ileostomy after rectal resection for cancer (EASY trial). *Surg Endosc*. 2019 Jan; 34(1):69-76
8. Keane C, Park J, Öberg S, Wedin A, Bock D, O'Grady G, Bissett I, Rosenberg J, Angenete E. Functional outcomes from a randomized trial of early closure of temporary ileostomy after rectal excision for cancer. *Br J Surg*. 2019 Apr; 106(5):645-652.
9. Tulchinsky H, Shacham-Shmueli E, Klausner JM, Inbar M, Geva R. Should a loop ileostomy closure in rectal cancer patients be done during or after adjuvant chemotherapy? *J Surg Oncol*. 2014 Mar; 109(3):266-9.
10. Biagi JJ, Raphael MJ, Mackillop WJ, Kong W, King WD, Booth CM. Association Between Time to Initiation of Adjuvant Chemotherapy and Survival in Colorectal Cancer. A Systematic Review and Meta-analysis. *JAMA*. 2011 Jun 8; 305(22):2335-42.
11. Aspinall SL, Good CB, Zhao X, et al. Adjuvant chemotherapy for stage III colon cancer: relative dose intensity and survival among veterans. *BMC Cancer*. 2015; 15:62.
12. Robertson JP, Wells CI, Vather R, Bissett IP. Effect of Diversion Ileostomy on the Occurrence and Consequences of Chemotherapy-Induced Diarrhea. *Dis Colon Rectum*. 2016 Mar; 59(3):194-200.
13. Siassi M, Hohenberger W, Losel F, et al. Quality of life and patient's expectations after closure of a temporary stoma. *Int J Colorectal Dis*. 2008 Dec; 23(12):1207-12.
14. Chow A, Tilney HS, Paraskeva P, et al. The morbidity surrounding reversal of defunctioning ileostomies: a systematic review of 48 studies including 6,107 cases. *Int J Colorectal Dis*. 2009 Jun; 24(6):711-23.

## Declarations:

### Authors' information

The STOMAD trial group is composed by:

Paolo Massucco MD<sup>Pl</sup> <sup>1</sup>, Andrea Fontana MD<sup>1</sup>, Michela Mineccia MD<sup>1</sup>, Serena Perotti MD<sup>1</sup>, Giovannino Ciccone MD<sup>2</sup>, Claudia Galassi MD<sup>2</sup>, Maria Carmela Giuffrida MD<sup>3</sup>, Donatella Marino MD<sup>4</sup>, Igor Monsellato MD<sup>5</sup>, Myriam Katja Paris MD<sup>6</sup>, Roberto Perinotti MD<sup>7</sup>, Patrizia Racca MD<sup>8</sup>, Chiara Monagheddu MD<sup>2</sup>, Fabio Saccona BEE<sup>2</sup>, Elisa Ponte MD<sup>9</sup>, Massimiliano Mistrangelo MD<sup>10</sup>, Mauro Santarelli MD<sup>11</sup>, Francesco Tomaselli MD<sup>12</sup>, Rossella Reddavid MD<sup>13</sup>, Simone Birolo MD<sup>14</sup>, Marcello Calabrò MD<sup>15</sup>, Nicoletta Pipitone MD<sup>15</sup>, Luca Panier Suffat MD<sup>16</sup>, Monica Carrera MD<sup>17</sup>, Francesco Potente MD<sup>18</sup>, Marco Brunetti MD<sup>19</sup>, Roberto Rimonda MD<sup>20</sup>, Vincenzo Adamo MD<sup>21</sup>, Domenico Piscioneri MD<sup>5</sup>, Francesca Cravero MD<sup>22</sup>, Alberto Serventi MD<sup>23</sup>, Eliana Giaminardi MD<sup>24</sup>, Luca Mazza MD<sup>25</sup>, Paolo Bellora MD<sup>26</sup>, Fabio Colli MD<sup>27</sup>, Clemente De Rosa MD<sup>28</sup>, Francesco Battafarano MD<sup>29</sup>, Renza Trapani MD<sup>30</sup>, Alfredo Mellano MD<sup>31</sup>, Enrico Gibin MD<sup>32</sup> and Paola Bellomo MD<sup>33</sup>

<sup>1</sup>Department of General and Oncological Surgery, AO Ordine Mauriziano, Ospedale Umberto I, Torino, Italy. <sup>2</sup>Clinical Epidemiology Unit, AOU Città della Salute e della Scienza, Torino, Italy. <sup>3</sup>Department of Surgery, AO S. Croce e Carle, Ospedale S. Croce, Cuneo, Italy. <sup>4</sup>Department of Oncology, AO Ordine Mauriziano, Ospedale Umberto I, Torino, Italy. <sup>5</sup>Department of Surgery, AO SS. Antonio e Biagio e Casare Arrigo, Ospedale SS. Antonio e Biagio, Alessandria, Italy. <sup>6</sup>Department of Oncology, ASL BI, Ospedale degli Infermi, Biella, Italy. <sup>7</sup>Department of Surgery, ASL BI, Ospedale degli Infermi, Biella, Italy. <sup>8</sup>Colorectal Cancer Unit, AOU Città della Salute e della Scienza, Torino, Italy. <sup>9</sup>Department of Surgery, Azienda USL Valle d'Aosta, Ospedale Parini, Aosta, Italy. <sup>10</sup>Department of Surgical Science, Università di Torino, AOU Città della Salute e della Scienza, Torino, Italy. <sup>11</sup>Department of General and Emergency Surgery, AOU Città della Salute e della Scienza, Torino, Italy. <sup>12</sup>Department of Surgery, ASL Città di Torino, Ospedale Martini, Torino, Italy. <sup>13</sup>Department of Surgical Oncology and Digestive Surgery, Università di Torino, AOU S. Luigi Gonzaga, Ospedale S. Luigi, Orbassano (TO), Italy. <sup>14</sup>Department of Surgery, ASL TO3, Ospedale degli Infermi, Rivoli (TO), Italy. <sup>15</sup>Department of Surgery, ASL TO3, Ospedale Agnelli, Pinerolo (TO), Italy. <sup>16</sup>Department of Surgery, ASL TO4, Ospedale Civile, Ivrea (TO), Italy. <sup>17</sup>Department of Surgery, ASL TO4, Ospedale di Ciriè, Ciriè (TO), Italy. <sup>18</sup>Department of Surgery, ASL TO5, Ospedale S. Croce, Moncalieri (TO), Italy. <sup>19</sup>Department of Surgery, ASL CN1, Ospedale SS. Annunziata, Savigliano (CN), Italy. <sup>20</sup>Department of Surgery, ASL CN1, Ospedale Regina Montis Regalis, Mondovì (CN), Italy. <sup>21</sup>Department of Surgery, ASL CN2, Ospedale S. Lazzaro, Alba (CN), Italy. <sup>22</sup>Department of Surgery, ASL AL, Ospedale S. Spirito, Casale M.to (AL), Italy. <sup>23</sup>Department of Surgery, ASL AL, Ospedale Mons. Galliano, Acqui Terme (AL), Italy. <sup>24</sup>Department of Surgery, ASL AL, Ospedale S. Giacomo, Novi Ligure (AL), Italy. <sup>25</sup>Department of Surgery, ASL AT, Ospedale Cardinal Massaia, Asti, Italy. <sup>26</sup>Department of Surgery, Università del Piemonte Orientale, AOU Maggiore della Carità, Ospedale Maggiore, Novara, Italy. <sup>27</sup>Department of Surgery, AOU Maggiore della Carità, Ospedale Maggiore, Novara, Italy. <sup>28</sup>Department of Surgery, ASL VC, Ospedale S. Andrea, Vercelli, Italy. <sup>29</sup>Department of Surgery, ASL VCO, Ospedale S. Biagio, Domodossola (VB), Italy. <sup>30</sup>Department of Surgery, ASL VCO, Ospedale Castelli, Verbania (VB), Italy. <sup>31</sup>Colorectal Surgical Unit, Fondazione del Piemonte per l'Oncologia, IRCCS, Candiolo, Torino, Italy. <sup>32</sup>Department of Surgery, Ospedale Cottolengo, Torino, Italy. <sup>33</sup> Department of Surgery, Ospedale Humanitas Gradenigo, Torino, Italy.

### Authors' contributions

PM proposed the conception and design of the study protocol. APF, MM, SP, GC, CG, MCG, DM, IM, MKP, RP, PR, CM and FS contributed to the initial conception, design, and the drafting of the protocol and represent the trial Steering Committee. EP, MM, MS, FT, RR, SB, MC, NSP, LPS, MC, FP, MB, RR, VA, DP, FC1, AS, EG1, LM, PB1, FC2, CDR, FB, RT, AM, EG2 and PB2 evaluated and approved the protocol and will be responsible for local patient accrual and data registration. All authors have approved the final submitted manuscript.

1  
2  
3  
4  
5  
6  
7  
8  
9  
10  
11  
12  
13  
14  
15  
16  
17  
18  
19  
20  
21  
22  
23  
24  
25  
26  
27  
28  
29  
30  
31  
32  
33  
34  
35  
36  
37  
38  
39  
40  
41  
42  
43  
44  
45  
46  
47  
48  
49  
50  
51  
52  
53  
54  
55  
56  
57  
58  
59  
60

### **Acknowledgements**

A special acknowledgment goes to the Director of *Rete Oncologica Piemonte e Valle d'Aosta*, Dr. O. Bertetto, for his support to this multicentre protocol and to Drs. F. Saccona and M. Abdallah for the elaboration of the on-line platform.

### **Ethics approval**

The study has been approved by the Ethical Review Board of *Azienda Ospedaliera Universitaria Città della Salute e della Scienza*, Turin (Italy).

### **Funding**

STOMAD is a non-profit clinical trial sponsored by *Rete Oncologica Piemonte e Valle d'Aosta*, Italy (<http://www.reteoncologica.it/>). It will not receive external funding.

### **Competing interests**

The authors declare that they have no competing interests.

### **Data availability**

Anonymized trial data will be available for 36 months after the results publication upon request to the principal investigator. Data will be provided in electronic dataset format containing deidentified participant files by the Unit of Epidemiology of the *Azienda Ospedaliera Universitaria Città della Salute e della Scienza*, Turin (Italy) after evaluation and approval of the request by the trial steering committee.

### **Patients and Public involvement**

Patients organizations were not involved in the conception and drafting of the trial. However, the endpoints were specifically designed to include patient-reported outcomes and validated quality of life questionnaires will be applied throughout the trial timeline.

### **ORCID iD**

Paolo Massucco <https://orcid.org/0000-0003-1620-0464>

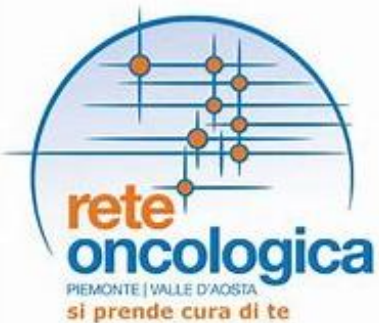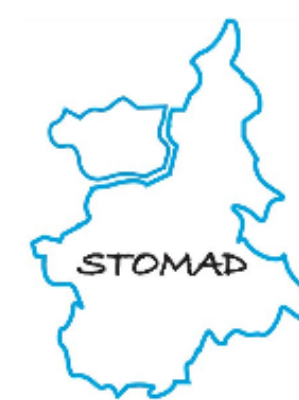

**Patient Population**  
 Curative resection for rectal neoplasm with temporary ileostomy  
 and indication to adjuvant therapy

ACCRUAL

- EXCLUSION CRITERIA**
- ASA >3
  - IV stage
  - ECOG Performance Status >=2
  - Severe non-controlled systemic, oncological or infectious disease

- INCLUSION CRITERIA**
- >= 18 years
  - No fistula (enema and/or endoscopy)
  - Indication to adjuvant therapy
  - Consent signed

INCLUSION/EXCLUSION  
 CRITERIA EVALUATION

ENDOSCOPY/ENEMA

ANASTOMOTIC LEAK

RANDOMIZATION

TREATMENT

ARM A  
 experimental

ARM B  
 standard

EARLY ILEOSTOMY  
 CLOSURE

ADJUVANT THERAPY

ADJUVANT THERAPY

ENDOSCOPY/ENEMA

ANASTOMOTIC LEAK

FOLLOW - UP

FOLLOW UP  
 (12 months from randomization)

FOLLOW UP  
 (12 months from randomization)

DATA ANALYSIS

LOST TO FOLLOW UP

**FINAL ANALYSIS**  
 Primary endpoint: adjuvant therapy compliance  
 Secondary endpoints: complications, costs, QoL, oncological outcome

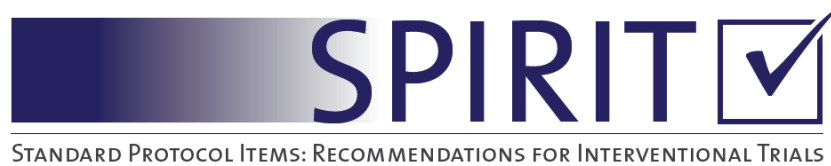

| Section/item                      | ItemNo | Description                                                                                                                                                                                                                                                                              | Addressed on page number |
|-----------------------------------|--------|------------------------------------------------------------------------------------------------------------------------------------------------------------------------------------------------------------------------------------------------------------------------------------------|--------------------------|
| <b>Administrative information</b> |        |                                                                                                                                                                                                                                                                                          |                          |
| Title                             | 1      | Descriptive title identifying the study design, population, interventions, and, if applicable, trial acronym                                                                                                                                                                             | 1                        |
| Trial registration                | 2a     | Trial identifier and registry name. If not yet registered, name of intended registry                                                                                                                                                                                                     | 1                        |
|                                   | 2b     | All items from the World Health Organization Trial Registration Data Set                                                                                                                                                                                                                 | 1                        |
| Protocol version                  | 3      | Date and version identifier                                                                                                                                                                                                                                                              | NA                       |
| Funding                           | 4      | Sources and types of financial, material, and other support                                                                                                                                                                                                                              | 17                       |
| Roles and responsibilities        | 5a     | Names, affiliations, and roles of protocol contributors                                                                                                                                                                                                                                  | 16                       |
|                                   | 5b     | Name and contact information for the trial sponsor                                                                                                                                                                                                                                       | 17                       |
|                                   | 5c     | Role of study sponsor and funders, if any, in study design; collection, management, analysis, and interpretation of data; writing of the report; and the decision to submit the report for publication, including whether they will have ultimate authority over any of these activities | NA                       |

|    |                                                           |                                                                                                    |    |
|----|-----------------------------------------------------------|----------------------------------------------------------------------------------------------------|----|
| 1  |                                                           |                                                                                                    |    |
| 2  |                                                           |                                                                                                    |    |
| 3  |                                                           |                                                                                                    |    |
| 4  |                                                           | 5d                                                                                                 | 16 |
| 5  |                                                           | Composition, roles, and responsibilities of the coordinating centre, steering committee,           |    |
| 6  |                                                           | endpoint adjudication committee, data management team, and other individuals or groups             |    |
| 7  |                                                           | overseeing the trial, if applicable (see Item 21a for data monitoring committee)                   |    |
| 8  |                                                           |                                                                                                    |    |
| 9  | <b>Introduction</b>                                       |                                                                                                    |    |
| 10 |                                                           |                                                                                                    |    |
| 11 | Background and                                            | 6a                                                                                                 | 3  |
| 12 | rationale                                                 | Description of research question and justification for undertaking the trial, including summary    |    |
| 13 |                                                           | of relevant studies (published and unpublished) examining benefits and harms for each              |    |
| 14 |                                                           | intervention                                                                                       |    |
| 15 |                                                           | 6b                                                                                                 | 4  |
| 16 |                                                           | Explanation for choice of comparators                                                              |    |
| 17 | Objectives                                                | 7                                                                                                  |    |
| 18 |                                                           | Specific objectives or hypotheses                                                                  |    |
| 19 | Trial design                                              | 8                                                                                                  | 4  |
| 20 |                                                           | Description of trial design including type of trial (eg, parallel group, crossover, factorial,     |    |
| 21 |                                                           | single group), allocation ratio, and framework (eg, superiority, equivalence, noninferiority,      |    |
| 22 |                                                           | exploratory)                                                                                       |    |
| 23 |                                                           |                                                                                                    |    |
| 24 |                                                           |                                                                                                    |    |
| 25 | <b>Methods: Participants, interventions, and outcomes</b> |                                                                                                    |    |
| 26 |                                                           |                                                                                                    |    |
| 27 | Study setting                                             | 9                                                                                                  | 5  |
| 28 |                                                           | Description of study settings (eg, community clinic, academic hospital) and list of countries      |    |
| 29 |                                                           | where data will be collected. Reference to where list of study sites can be obtained               |    |
| 30 | Eligibility criteria                                      | 10                                                                                                 | 6  |
| 31 |                                                           | Inclusion and exclusion criteria for participants. If applicable, eligibility criteria for study   |    |
| 32 |                                                           | centres and individuals who will perform the interventions (eg, surgeons, psychotherapists)        |    |
| 33 | Interventions                                             | 11a                                                                                                | 4  |
| 34 |                                                           | Interventions for each group with sufficient detail to allow replication, including how and        |    |
| 35 |                                                           | when they will be administered                                                                     |    |
| 36 |                                                           | 11b                                                                                                | NA |
| 37 |                                                           | Criteria for discontinuing or modifying allocated interventions for a given trial participant (eg, |    |
| 38 |                                                           | drug dose change in response to harms, participant request, or improving/worsening                 |    |
| 39 |                                                           | disease)                                                                                           |    |
| 40 |                                                           |                                                                                                    |    |
| 41 |                                                           |                                                                                                    |    |
| 42 |                                                           |                                                                                                    |    |
| 43 |                                                           |                                                                                                    |    |
| 44 |                                                           |                                                                                                    |    |
| 45 |                                                           |                                                                                                    |    |
| 46 |                                                           |                                                                                                    |    |



1  
2  
3  
4  
5  
6  
7  
8  
9  
10  
11  
12  
13  
14  
15  
16  
17  
18  
19  
20  
21  
22  
23  
24  
25  
26  
27  
28  
29  
30  
31  
32  
33  
34  
35  
36  
37  
38  
39  
40  
41  
42  
43  
44  
45  
46

|                      |     |                                                                                                                                                                                                                                                                                                                                                                                |    |
|----------------------|-----|--------------------------------------------------------------------------------------------------------------------------------------------------------------------------------------------------------------------------------------------------------------------------------------------------------------------------------------------------------------------------------|----|
|                      | 11c | Strategies to improve adherence to intervention protocols, and any procedures for monitoring adherence (eg, drug tablet return, laboratory tests)                                                                                                                                                                                                                              | NA |
|                      | 11d | Relevant concomitant care and interventions that are permitted or prohibited during the trial                                                                                                                                                                                                                                                                                  | 8  |
| Outcomes             | 12  | Primary, secondary, and other outcomes, including the specific measurement variable (eg, systolic blood pressure), analysis metric (eg, change from baseline, final value, time to event), method of aggregation (eg, median, proportion), and time point for each outcome. Explanation of the clinical relevance of chosen efficacy and harm outcomes is strongly recommended | 9  |
| Participant timeline | 13  | Time schedule of enrolment, interventions (including any run-ins and washouts), assessments, and visits for participants. A schematic diagram is highly recommended (see Figure)                                                                                                                                                                                               | 14 |
| Sample size          | 14  | Estimated number of participants needed to achieve study objectives and how it was determined, including clinical and statistical assumptions supporting any sample size calculations                                                                                                                                                                                          | 10 |
| Recruitment          | 15  | Strategies for achieving adequate participant enrolment to reach target sample size                                                                                                                                                                                                                                                                                            | NA |

**Methods: Assignment of interventions (for controlled trials)**

Allocation:

|                     |     |                                                                                                                                                                                                                                                                                                                                                          |    |
|---------------------|-----|----------------------------------------------------------------------------------------------------------------------------------------------------------------------------------------------------------------------------------------------------------------------------------------------------------------------------------------------------------|----|
| Sequence generation | 16a | Method of generating the allocation sequence (eg, computer-generated random numbers), and list of any factors for stratification. To reduce predictability of a random sequence, details of any planned restriction (eg, blocking) should be provided in a separate document that is unavailable to those who enrol participants or assign interventions | 10 |
|---------------------|-----|----------------------------------------------------------------------------------------------------------------------------------------------------------------------------------------------------------------------------------------------------------------------------------------------------------------------------------------------------------|----|

|    |                                                           |     |                                                                                                |       |
|----|-----------------------------------------------------------|-----|------------------------------------------------------------------------------------------------|-------|
| 1  |                                                           |     |                                                                                                |       |
| 2  |                                                           |     |                                                                                                |       |
| 3  |                                                           |     |                                                                                                |       |
| 4  | Allocation                                                | 16b | Mechanism of implementing the allocation sequence (eg, central telephone; sequentially         | 10    |
| 5  | concealment                                               |     | numbered, opaque, sealed envelopes), describing any steps to conceal the sequence until        |       |
| 6  | mechanism                                                 |     | interventions are assigned                                                                     |       |
| 7  |                                                           |     |                                                                                                |       |
| 8  | Implementation                                            | 16c | Who will generate the allocation sequence, who will enrol participants, and who will assign    | 10    |
| 9  |                                                           |     | participants to interventions                                                                  |       |
| 10 |                                                           |     |                                                                                                |       |
| 11 | Blinding (masking)                                        | 17a | Who will be blinded after assignment to interventions (eg, trial participants, care providers, | NA    |
| 12 |                                                           |     | outcome assessors, data analysts), and how                                                     |       |
| 13 |                                                           |     |                                                                                                |       |
| 14 |                                                           | 17b | If blinded, circumstances under which unblinding is permissible, and procedure for revealing   | NA    |
| 15 |                                                           |     | a participant's allocated intervention during the trial                                        |       |
| 16 |                                                           |     |                                                                                                |       |
| 17 |                                                           |     |                                                                                                |       |
| 18 |                                                           |     |                                                                                                |       |
| 19 | <b>Methods: Data collection, management, and analysis</b> |     |                                                                                                |       |
| 20 |                                                           |     |                                                                                                |       |
| 21 | Data collection                                           | 18a | Plans for assessment and collection of outcome, baseline, and other trial data, including any  | 9, 10 |
| 22 | methods                                                   |     | related processes to promote data quality (eg, duplicate measurements, training of             |       |
| 23 |                                                           |     | assessors) and a description of study instruments (eg, questionnaires, laboratory tests)       |       |
| 24 |                                                           |     | along with their reliability and validity, if known. Reference to where data collection forms  |       |
| 25 |                                                           |     | can be found, if not in the protocol                                                           |       |
| 26 |                                                           |     |                                                                                                |       |
| 27 |                                                           |     |                                                                                                |       |
| 28 |                                                           | 18b | Plans to promote participant retention and complete follow-up, including list of any outcome   | 9, 10 |
| 29 |                                                           |     | data to be collected for participants who discontinue or deviate from intervention protocols   |       |
| 30 |                                                           |     |                                                                                                |       |
| 31 | Data management                                           | 19  | Plans for data entry, coding, security, and storage, including any related processes to        | 12    |
| 32 |                                                           |     | promote data quality (eg, double data entry; range checks for data values). Reference to       |       |
| 33 |                                                           |     | where details of data management procedures can be found, if not in the protocol               |       |
| 34 |                                                           |     |                                                                                                |       |
| 35 | Statistical methods                                       | 20a | Statistical methods for analysing primary and secondary outcomes. Reference to where           | 11    |
| 36 |                                                           |     | other details of the statistical analysis plan can be found, if not in the protocol            |       |
| 37 |                                                           |     |                                                                                                |       |
| 38 |                                                           | 20b | Methods for any additional analyses (eg, subgroup and adjusted analyses)                       | NA    |
| 39 |                                                           |     |                                                                                                |       |
| 40 |                                                           |     |                                                                                                |       |
| 41 |                                                           |     |                                                                                                |       |
| 42 |                                                           |     |                                                                                                |       |
| 43 |                                                           |     |                                                                                                |       |
| 44 |                                                           |     |                                                                                                |       |
| 45 |                                                           |     |                                                                                                |       |
| 46 |                                                           |     |                                                                                                |       |

1  
2  
3  
4  
5  
6  
7  
8  
9  
10  
11  
12  
13  
14  
15  
16  
17  
18  
19  
20  
21  
22  
23  
24  
25  
26  
27  
28  
29  
30  
31  
32  
33  
34  
35  
36  
37  
38  
39  
40  
41  
42  
43  
44  
45  
46

|  |     |                                                                                                                                                                                 |    |
|--|-----|---------------------------------------------------------------------------------------------------------------------------------------------------------------------------------|----|
|  | 20c | Definition of analysis population relating to protocol non-adherence (eg, as randomised analysis), and any statistical methods to handle missing data (eg, multiple imputation) | 11 |
|--|-----|---------------------------------------------------------------------------------------------------------------------------------------------------------------------------------|----|

**Methods: Monitoring**

|                 |     |                                                                                                                                                                                                                                                                                                                                       |    |
|-----------------|-----|---------------------------------------------------------------------------------------------------------------------------------------------------------------------------------------------------------------------------------------------------------------------------------------------------------------------------------------|----|
| Data monitoring | 21a | Composition of data monitoring committee (DMC); summary of its role and reporting structure; statement of whether it is independent from the sponsor and competing interests; and reference to where further details about its charter can be found, if not in the protocol. Alternatively, an explanation of why a DMC is not needed | NA |
|-----------------|-----|---------------------------------------------------------------------------------------------------------------------------------------------------------------------------------------------------------------------------------------------------------------------------------------------------------------------------------------|----|

|  |     |                                                                                                                                                                         |    |
|--|-----|-------------------------------------------------------------------------------------------------------------------------------------------------------------------------|----|
|  | 21b | Description of any interim analyses and stopping guidelines, including who will have access to these interim results and make the final decision to terminate the trial | 13 |
|--|-----|-------------------------------------------------------------------------------------------------------------------------------------------------------------------------|----|

|       |    |                                                                                                                                                                                   |    |
|-------|----|-----------------------------------------------------------------------------------------------------------------------------------------------------------------------------------|----|
| Harms | 22 | Plans for collecting, assessing, reporting, and managing solicited and spontaneously reported adverse events and other unintended effects of trial interventions or trial conduct | 13 |
|-------|----|-----------------------------------------------------------------------------------------------------------------------------------------------------------------------------------|----|

|          |    |                                                                                                                                             |    |
|----------|----|---------------------------------------------------------------------------------------------------------------------------------------------|----|
| Auditing | 23 | Frequency and procedures for auditing trial conduct, if any, and whether the process will be independent from investigators and the sponsor | NA |
|----------|----|---------------------------------------------------------------------------------------------------------------------------------------------|----|

**Ethics and dissemination**

|                          |    |                                                                                           |    |
|--------------------------|----|-------------------------------------------------------------------------------------------|----|
| Research ethics approval | 24 | Plans for seeking research ethics committee/institutional review board (REC/IRB) approval | 17 |
|--------------------------|----|-------------------------------------------------------------------------------------------|----|

|                     |    |                                                                                                                                                                                                                                  |    |
|---------------------|----|----------------------------------------------------------------------------------------------------------------------------------------------------------------------------------------------------------------------------------|----|
| Protocol amendments | 25 | Plans for communicating important protocol modifications (eg, changes to eligibility criteria, outcomes, analyses) to relevant parties (eg, investigators, REC/IRBs, trial participants, trial registries, journals, regulators) | 17 |
|---------------------|----|----------------------------------------------------------------------------------------------------------------------------------------------------------------------------------------------------------------------------------|----|

|                   |     |                                                                                                                              |    |
|-------------------|-----|------------------------------------------------------------------------------------------------------------------------------|----|
| Consent or assent | 26a | Who will obtain informed consent or assent from potential trial participants or authorised surrogates, and how (see Item 32) | 12 |
|-------------------|-----|------------------------------------------------------------------------------------------------------------------------------|----|

|  |     |                                                                                                                                       |    |
|--|-----|---------------------------------------------------------------------------------------------------------------------------------------|----|
|  | 26b | Additional consent provisions for collection and use of participant data and biological specimens in ancillary studies, if applicable | NA |
|--|-----|---------------------------------------------------------------------------------------------------------------------------------------|----|

|    |                               |     |                                                                                                                                                                                                                                                                                     |    |
|----|-------------------------------|-----|-------------------------------------------------------------------------------------------------------------------------------------------------------------------------------------------------------------------------------------------------------------------------------------|----|
| 1  |                               |     |                                                                                                                                                                                                                                                                                     |    |
| 2  |                               |     |                                                                                                                                                                                                                                                                                     |    |
| 3  |                               |     |                                                                                                                                                                                                                                                                                     |    |
| 4  | Confidentiality               | 27  | How personal information about potential and enrolled participants will be collected, shared, and maintained in order to protect confidentiality before, during, and after the trial                                                                                                | 12 |
| 5  |                               |     |                                                                                                                                                                                                                                                                                     |    |
| 6  |                               |     |                                                                                                                                                                                                                                                                                     |    |
| 7  | Declaration of interests      | 28  | Financial and other competing interests for principal investigators for the overall trial and each study site                                                                                                                                                                       | 17 |
| 8  |                               |     |                                                                                                                                                                                                                                                                                     |    |
| 9  |                               |     |                                                                                                                                                                                                                                                                                     |    |
| 10 | Access to data                | 29  | Statement of who will have access to the final trial dataset, and disclosure of contractual agreements that limit such access for investigators                                                                                                                                     | 17 |
| 11 |                               |     |                                                                                                                                                                                                                                                                                     |    |
| 12 |                               |     |                                                                                                                                                                                                                                                                                     |    |
| 13 | Ancillary and post-trial care | 30  | Provisions, if any, for ancillary and post-trial care, and for compensation to those who suffer harm from trial participation                                                                                                                                                       | NA |
| 14 |                               |     |                                                                                                                                                                                                                                                                                     |    |
| 15 |                               |     |                                                                                                                                                                                                                                                                                     |    |
| 16 | Dissemination policy          | 31a | Plans for investigators and sponsor to communicate trial results to participants, healthcare professionals, the public, and other relevant groups (eg, via publication, reporting in results databases, or other data sharing arrangements), including any publication restrictions | 13 |
| 17 |                               |     |                                                                                                                                                                                                                                                                                     |    |
| 18 |                               |     |                                                                                                                                                                                                                                                                                     |    |
| 19 |                               |     |                                                                                                                                                                                                                                                                                     |    |
| 20 |                               |     |                                                                                                                                                                                                                                                                                     |    |
| 21 |                               | 31b | Authorship eligibility guidelines and any intended use of professional writers                                                                                                                                                                                                      | NA |
| 22 |                               |     |                                                                                                                                                                                                                                                                                     |    |
| 23 |                               | 31c | Plans, if any, for granting public access to the full protocol, participant-level dataset, and statistical code                                                                                                                                                                     | 13 |
| 24 |                               |     |                                                                                                                                                                                                                                                                                     |    |
| 25 |                               |     |                                                                                                                                                                                                                                                                                     |    |
| 26 |                               |     |                                                                                                                                                                                                                                                                                     |    |
| 27 | <b>Appendices</b>             |     |                                                                                                                                                                                                                                                                                     |    |
| 28 | Informed consent materials    | 32  | Model consent form and other related documentation given to participants and authorised surrogates                                                                                                                                                                                  | NA |
| 29 |                               |     |                                                                                                                                                                                                                                                                                     |    |
| 30 |                               |     |                                                                                                                                                                                                                                                                                     |    |
| 31 | Biological specimens          | 33  | Plans for collection, laboratory evaluation, and storage of biological specimens for genetic or molecular analysis in the current trial and for future use in ancillary studies, if applicable                                                                                      | NA |
| 32 |                               |     |                                                                                                                                                                                                                                                                                     |    |
| 33 |                               |     |                                                                                                                                                                                                                                                                                     |    |
| 34 |                               |     |                                                                                                                                                                                                                                                                                     |    |
| 35 |                               |     |                                                                                                                                                                                                                                                                                     |    |
| 36 |                               |     |                                                                                                                                                                                                                                                                                     |    |
| 37 |                               |     |                                                                                                                                                                                                                                                                                     |    |
| 38 |                               |     |                                                                                                                                                                                                                                                                                     |    |
| 39 |                               |     |                                                                                                                                                                                                                                                                                     |    |
| 40 |                               |     |                                                                                                                                                                                                                                                                                     |    |
| 41 |                               |     |                                                                                                                                                                                                                                                                                     |    |
| 42 |                               |     |                                                                                                                                                                                                                                                                                     |    |
| 43 |                               |     |                                                                                                                                                                                                                                                                                     |    |
| 44 |                               |     |                                                                                                                                                                                                                                                                                     |    |
| 45 |                               |     |                                                                                                                                                                                                                                                                                     |    |
| 46 |                               |     |                                                                                                                                                                                                                                                                                     |    |

# BMJ Open

**A prospective, randomized, multicentre, open-label trial, designed to evaluate the best timing of closure of the temporary ileostomy (early versus late) in patients who underwent rectal cancer resection and with indication for adjuvant chemotherapy. The STOMAD (STOMa closure before or after ADjuvant therapy) randomized controlled trial.**

|                               |                                                                                                                                                                                                                                                                                                                                                                                                                                                                                                                                                                                                                                                                                                                                                                                                                                                                                                                                                                                                                                                                                                                                                                                                                                                                                                                                                                                                                                                                                                                                                                                                                                                                                                                                                                                                                                                                                                                                                                                                                                                                                                                                         |
|-------------------------------|-----------------------------------------------------------------------------------------------------------------------------------------------------------------------------------------------------------------------------------------------------------------------------------------------------------------------------------------------------------------------------------------------------------------------------------------------------------------------------------------------------------------------------------------------------------------------------------------------------------------------------------------------------------------------------------------------------------------------------------------------------------------------------------------------------------------------------------------------------------------------------------------------------------------------------------------------------------------------------------------------------------------------------------------------------------------------------------------------------------------------------------------------------------------------------------------------------------------------------------------------------------------------------------------------------------------------------------------------------------------------------------------------------------------------------------------------------------------------------------------------------------------------------------------------------------------------------------------------------------------------------------------------------------------------------------------------------------------------------------------------------------------------------------------------------------------------------------------------------------------------------------------------------------------------------------------------------------------------------------------------------------------------------------------------------------------------------------------------------------------------------------------|
| Journal:                      | <i>BMJ Open</i>                                                                                                                                                                                                                                                                                                                                                                                                                                                                                                                                                                                                                                                                                                                                                                                                                                                                                                                                                                                                                                                                                                                                                                                                                                                                                                                                                                                                                                                                                                                                                                                                                                                                                                                                                                                                                                                                                                                                                                                                                                                                                                                         |
| Manuscript ID                 | bmjopen-2020-044692.R1                                                                                                                                                                                                                                                                                                                                                                                                                                                                                                                                                                                                                                                                                                                                                                                                                                                                                                                                                                                                                                                                                                                                                                                                                                                                                                                                                                                                                                                                                                                                                                                                                                                                                                                                                                                                                                                                                                                                                                                                                                                                                                                  |
| Article Type:                 | Protocol                                                                                                                                                                                                                                                                                                                                                                                                                                                                                                                                                                                                                                                                                                                                                                                                                                                                                                                                                                                                                                                                                                                                                                                                                                                                                                                                                                                                                                                                                                                                                                                                                                                                                                                                                                                                                                                                                                                                                                                                                                                                                                                                |
| Date Submitted by the Author: | 19-Jan-2021                                                                                                                                                                                                                                                                                                                                                                                                                                                                                                                                                                                                                                                                                                                                                                                                                                                                                                                                                                                                                                                                                                                                                                                                                                                                                                                                                                                                                                                                                                                                                                                                                                                                                                                                                                                                                                                                                                                                                                                                                                                                                                                             |
| Complete List of Authors:     | <p>Massucco, Paolo; Azienda Ospedaliera Ordine Mauriziano di Torino, General and Oncological Surgery</p> <p>Fontana, Andrea; Azienda Ospedaliera Ordine Mauriziano di Torino, General and Oncological Surgery</p> <p>Mineccia, Michela; Azienda Ospedaliera Ordine Mauriziano di Torino, General and Oncological Surgery</p> <p>Perotti, Serena; Azienda Ospedaliera Ordine Mauriziano di Torino, General and Oncological Surgery</p> <p>Ciccone, Giovannino; Azienda Ospedaliero Universitaria Citta della Salute e della Scienza di Torino, Clinical Epidemiology Unit</p> <p>Galassi, Claudia; Azienda Ospedaliero Universitaria Citta della Salute e della Scienza di Torino, Clinical Epidemiology Unit</p> <p>Giuffrida, Maria Carmela; Azienda Ospedaliera S Croce e Carle Cuneo, Department of Surgery</p> <p>Marino, D; Azienda Ospedaliera Ordine Mauriziano di Torino, Department of Oncology</p> <p>Monsellato, Igor; Azienda Ospedaliera Nazionale SS Antonio e Biagio e C Arrigo, Department of Surgery</p> <p>Paris, Myriam Katja; Ospedale degli Infermi, Department of Oncology</p> <p>Perinotti, Roberto; Ospedale degli Infermi, Department of Surgery</p> <p>Racca, Patrizia; Azienda Ospedaliero Universitaria Citta della Salute e della Scienza di Torino, Colorectal Cancer Unit</p> <p>Monagheddu, Chiara; Azienda Ospedaliero Universitaria Citta della Salute e della Scienza di Torino, Clinical Epidemiology Unit</p> <p>Saccona, Fabio; Azienda Ospedaliero Universitaria Citta della Salute e della Scienza di Torino, Clinical Epidemiology Unit</p> <p>Ponte, Elisa; Ospedale Regionale Umberto Parini, Department of Surgery</p> <p>Mistrangelo, Massimiliano; Azienda Ospedaliero Universitaria Citta della Salute e della Scienza di Torino, Department of Surgical Science, Turin University</p> <p>Santarelli, Mauro; Azienda Ospedaliero Universitaria Citta della Salute e della Scienza di Torino, Department of General and Emergency Surgery</p> <p>Tomaselli, Francesco; Ospedale Martini, Department of Surgery</p> <p>Reddavid, Rossella; Azienda Ospedaliero Universitaria San Luigi</p> |

|                                 |                                                                                                                                                                                                                                                                                                                                                                                                                                                                                                                                                                                                                                                                                                                                                                                                                                                                                                                                                                                                                                                                                                                                                                                                                                                                                                                                                                                                                                                                                                                                                                                                                                                                                                                                                                                                                                                                                                                                                                                                                                                                                                 |
|---------------------------------|-------------------------------------------------------------------------------------------------------------------------------------------------------------------------------------------------------------------------------------------------------------------------------------------------------------------------------------------------------------------------------------------------------------------------------------------------------------------------------------------------------------------------------------------------------------------------------------------------------------------------------------------------------------------------------------------------------------------------------------------------------------------------------------------------------------------------------------------------------------------------------------------------------------------------------------------------------------------------------------------------------------------------------------------------------------------------------------------------------------------------------------------------------------------------------------------------------------------------------------------------------------------------------------------------------------------------------------------------------------------------------------------------------------------------------------------------------------------------------------------------------------------------------------------------------------------------------------------------------------------------------------------------------------------------------------------------------------------------------------------------------------------------------------------------------------------------------------------------------------------------------------------------------------------------------------------------------------------------------------------------------------------------------------------------------------------------------------------------|
|                                 | <p>Gonzaga, Department of Surgical Oncology and Digestive Surgery, Turin University</p> <p>Birolo, Simone; Ospedale degli Infermi, Department of Surgery</p> <p>Calabrò, Marcello; Ospedale Edoardo Agnelli di Pinerolo, Department of Surgery</p> <p>Pipitone, Nicoletta; Ospedale Edoardo Agnelli di Pinerolo, Department of Surgery</p> <p>Panier Suffat, Luca; Ospedale di Ivrea, Department of Surgery</p> <p>Carrera, Monica; Ospedale di Cirie, Department of Surgery</p> <p>Potente, Francesco; Azienda Sanitaria Locale TO5, Ospedale Santa Croce, Department of Surgery</p> <p>Brunetti, Marco; Ospedale SS Annunziata di Savigliano, Department of Surgery</p> <p>Rimonda, Roberto; Azienda Sanitaria Locale CN1, Ospedale Regina Montis, Department of Surgery</p> <p>Adamo, Vincenzo; Ospedale San Lazzaro Alba, Department of Surgery</p> <p>Piscioneri, Domenico; Azienda Ospedaliera Nazionale SS Antonio e Biagio e C Arrigo, Department of Surgery</p> <p>Cravero, Francesca; Ospedale Santo Spirito, Department of Surgery</p> <p>Serventi, Alberto; Azienda Sanitaria Locale Alessandria, Ospedale Mons. Galliano, Department of Surgery</p> <p>Giaminardi, Eliana; Ospedale San Giacomo di Novi Ligure, Department of Surgery</p> <p>Mazza, Luca; Ospedale Cardinal Massaia di Asti, Department of Surgery</p> <p>Bellora, Paolo; Azienda Ospedaliera Maggiore della Carita, Department of Surgery, Eastern Piedmont University</p> <p>Colli, Fabio; Azienda Ospedaliera Maggiore della Carita, Department of Surgery</p> <p>De Rosa, Clemente; Presidio Ospedaliero Sant'Andrea di Vercelli, Department of Surgery</p> <p>Battafarano, Francesco; Azienda Sanitaria Locale di Verbanio Cusio e Ossola, Ospedale S. Biagio, Department of Surgery</p> <p>Trapani, Renza; Ospedale Castelli Verbania, Department of Surgery</p> <p>Mellano, Alfredo; Candiolo Cancer Institute, Colorectal Surgical Unit</p> <p>Gibin, Enrico; Presidio Sanitario Ospedale Cottolengo, Department of Surgery</p> <p>Bellomo, Paola; Presidio Sanitario Gradenigo, Department of Surgery</p> |
| <b>Primary Subject Heading</b>: | Surgery                                                                                                                                                                                                                                                                                                                                                                                                                                                                                                                                                                                                                                                                                                                                                                                                                                                                                                                                                                                                                                                                                                                                                                                                                                                                                                                                                                                                                                                                                                                                                                                                                                                                                                                                                                                                                                                                                                                                                                                                                                                                                         |
| Secondary Subject Heading:      | Health services research                                                                                                                                                                                                                                                                                                                                                                                                                                                                                                                                                                                                                                                                                                                                                                                                                                                                                                                                                                                                                                                                                                                                                                                                                                                                                                                                                                                                                                                                                                                                                                                                                                                                                                                                                                                                                                                                                                                                                                                                                                                                        |
| Keywords:                       | Quality in health care < HEALTH SERVICES ADMINISTRATION & MANAGEMENT, Colorectal surgery < SURGERY, CHEMOTHERAPY                                                                                                                                                                                                                                                                                                                                                                                                                                                                                                                                                                                                                                                                                                                                                                                                                                                                                                                                                                                                                                                                                                                                                                                                                                                                                                                                                                                                                                                                                                                                                                                                                                                                                                                                                                                                                                                                                                                                                                                |
|                                 |                                                                                                                                                                                                                                                                                                                                                                                                                                                                                                                                                                                                                                                                                                                                                                                                                                                                                                                                                                                                                                                                                                                                                                                                                                                                                                                                                                                                                                                                                                                                                                                                                                                                                                                                                                                                                                                                                                                                                                                                                                                                                                 |

SCHOLARONE™  
Manuscripts



I, the Submitting Author has the right to grant and does grant on behalf of all authors of the Work (as defined in the below author licence), an exclusive licence and/or a non-exclusive licence for contributions from authors who are: i) UK Crown employees; ii) where BMJ has agreed a CC-BY licence shall apply, and/or iii) in accordance with the terms applicable for US Federal Government officers or employees acting as part of their official duties; on a worldwide, perpetual, irrevocable, royalty-free basis to BMJ Publishing Group Ltd ("BMJ") its licensees and where the relevant Journal is co-owned by BMJ to the co-owners of the Journal, to publish the Work in this journal and any other BMJ products and to exploit all rights, as set out in our [licence](#).

The Submitting Author accepts and understands that any supply made under these terms is made by BMJ to the Submitting Author unless you are acting as an employee on behalf of your employer or a postgraduate student of an affiliated institution which is paying any applicable article publishing charge ("APC") for Open Access articles. Where the Submitting Author wishes to make the Work available on an Open Access basis (and intends to pay the relevant APC), the terms of reuse of such Open Access shall be governed by a Creative Commons licence – details of these licences and which [Creative Commons](#) licence will apply to this Work are set out in our licence referred to above.

Other than as permitted in any relevant BMJ Author's Self Archiving Policies, I confirm this Work has not been accepted for publication elsewhere, is not being considered for publication elsewhere and does not duplicate material already published. I confirm all authors consent to publication of this Work and authorise the granting of this licence.

**Title page:**

***A prospective, randomized, multicentre, open-label trial, designed to evaluate the best timing of closure of the temporary ileostomy (early versus late) in patients who underwent rectal cancer resection and with indication for adjuvant chemotherapy. The STOMAD (STOMa closure before or after ADjuvant therapy) randomized controlled trial.***

Paolo Massucco MD<sup>PI 1\*</sup>, Andrea Fontana MD<sup>1</sup>, Michela Mineccia MD<sup>1</sup>, Serena Perotti MD<sup>1</sup>, Giovannino Ciccone MD<sup>2</sup>, Claudia Galassi MD<sup>2</sup>, Maria Carmela Giuffrida MD<sup>3</sup>, Donatella Marino MD<sup>4</sup>, Igor Monsellato MD<sup>5</sup>, Myriam Katja Paris MD<sup>6</sup>, Roberto Perinotti MD<sup>7</sup>, Patrizia Racca MD<sup>8</sup>, Chiara Monagheddu MD<sup>2</sup>, Fabio Saccona BEE<sup>2</sup>, Elisa Ponte MD<sup>9</sup>, Massimiliano Mistrangelo MD<sup>10</sup>, Mauro Santarelli MD<sup>11</sup>, Francesco Tomaselli MD<sup>12</sup>, Rossella Reddavid MD<sup>13</sup>, Simone Birolo MD<sup>14</sup>, Marcello Calabrò MD<sup>15</sup>, Nicoletta Pipitone MD<sup>15</sup>, Luca Panier Suffat MD<sup>16</sup>, Monica Carrera MD<sup>17</sup>, Francesco Potente MD<sup>18</sup>, Marco Brunetti MD<sup>19</sup>, Roberto Rimonda MD<sup>20</sup>, Vincenzo Adamo MD<sup>21</sup>, Domenico Piscioneri MD<sup>5</sup>, Francesca Cravero MD<sup>22</sup>, Alberto Serventi MD<sup>23</sup>, Eliana Giaminardi MD<sup>24</sup>, Luca Mazza MD<sup>25</sup>, Paolo Bellora MD<sup>26</sup>, Fabio Colli MD<sup>27</sup>, Clemente De Rosa MD<sup>28</sup>, Francesco Battafarano MD<sup>29</sup>, Renza Trapani MD<sup>30</sup>, Alfredo Mellano MD<sup>31</sup>, Enrico Gibin MD<sup>32</sup> and Paola Bellomo MD.<sup>33</sup>

All Authors are members of Rete Oncologica Piemonte e Valle d'Aosta (Oncology Network of Piedmont and Aosta Valley – Italy). Authors' contributions list is available at the end of the article.

<sup>1</sup>Department of General and Oncological Surgery, AO Ordine Mauriziano, Ospedale Umberto I, Torino, Italy. <sup>2</sup>Clinical Epidemiology Unit, AOU Città della Salute e della Scienza, Torino, Italy. <sup>3</sup>Department of Surgery, AO S. Croce e Carle, Ospedale S. Croce, Cuneo, Italy. <sup>4</sup>Department of Oncology, AO Ordine Mauriziano, Ospedale Umberto I, Torino, Italy. <sup>5</sup>Department of Surgery, AO SS. Antonio e Biagio e Casare Arrigo, Ospedale SS. Antonio e Biagio, Alessandria, Italy. <sup>6</sup>Department of Oncology, ASL BI, Ospedale degli Infermi, Biella, Italy. <sup>7</sup>Department of Surgery, ASL BI, Ospedale degli Infermi, Biella, Italy. <sup>8</sup>Colorectal Cancer Unit, AOU Città della Salute e della Scienza, Torino, Italy. <sup>9</sup>Department of Surgery, Azienda USL Valle d'Aosta, Ospedale Parini, Aosta, Italy. <sup>10</sup>Department of Surgical Science, Università di Torino, AOU Città della Salute e della Scienza, Torino, Italy. <sup>11</sup>Department of General and Emergency Surgery, AOU Città della Salute e della Scienza, Torino, Italy. <sup>12</sup>Department of Surgery, ASL Città di Torino, Ospedale Martini, Torino, Italy. <sup>13</sup>Department of Surgical Oncology and Digestive Surgery, Università di Torino, AOU S. Luigi Gonzaga, Ospedale S. Luigi, Orbassano (TO), Italy. <sup>14</sup>Department of Surgery, ASL TO3, Ospedale degli Infermi, Rivoli (TO), Italy. <sup>15</sup>Department of Surgery, ASL TO3, Ospedale Agnelli, Pinerolo (TO), Italy. <sup>16</sup>Department of Surgery, ASL TO4, Ospedale Civile, Ivrea (TO), Italy. <sup>17</sup>Department of Surgery, ASL TO4, Ospedale di Ciriè, Ciriè (TO), Italy. <sup>18</sup>Department of Surgery, ASL TO5, Ospedale S. Croce, Moncalieri (TO), Italy. <sup>19</sup>Department of Surgery, ASL CN1, Ospedale SS. Annunziata, Savigliano (CN), Italy. <sup>20</sup>Department of Surgery, ASL CN1, Ospedale Regina Montis Regalis, Mondovì (CN), Italy. <sup>21</sup>Department of Surgery, ASL CN2, Ospedale S. Lazzaro, Alba (CN), Italy. <sup>22</sup>Department of Surgery, ASL AL, Ospedale S. Spirito, Casale M.to (AL), Italy. <sup>23</sup>Department of Surgery, ASL AL, Ospedale Mons. Galliano, Acqui Terme (AL), Italy. <sup>24</sup>Department of Surgery, ASL AL, Ospedale S. Giacomo, Novi Ligure (AL), Italy. <sup>25</sup>Department of Surgery, ASL AT, Ospedale Cardinal Massaia, Asti, Italy. <sup>26</sup>Department of Surgery, Università del Piemonte Orientale, AOU Maggiore della Carità, Ospedale Maggiore, Novara, Italy. <sup>27</sup>Department of Surgery, AOU Maggiore della Carità, Ospedale Maggiore, Novara, Italy. <sup>28</sup>Department of Surgery, ASL VC, Ospedale S. Andrea, Vercelli, Italy. <sup>29</sup>Department of Surgery, ASL VCO, Ospedale S. Biagio, Domodossola (VB), Italy. <sup>30</sup>Department of Surgery, ASL VCO, Ospedale Castelli, Verbania (VB), Italy. <sup>31</sup>Colorectal Surgical Unit, Fondazione del Piemonte per l'Oncologia, IRCCS, Candiolo, Torino, Italy. <sup>32</sup>Department of Surgery, Ospedale Cottolengo, Torino, Italy. <sup>33</sup> Department of Surgery, Ospedale Humanitas Gradenigo, Torino, Italy.



1  
2  
3 \* Correspondence to: [pmassucco@mauriziano.it](mailto:pmassucco@mauriziano.it)

4 *P. Massucco, MD - General and Oncological Surgery, AO Ordine Mauriziano, Umberto I Hospital,*  
5 *Largo Filippo Turati, 62, 10128 Turin (Italy) – tel. +290115082734.*

6 *Orcid ID - Paolo Massucco <https://orcid.org/0000-0003-1620-0464>.*  
7  
8

9 Word count: 2754  
10  
11  
12  
13  
14  
15  
16  
17  
18  
19  
20  
21  
22  
23  
24  
25  
26  
27  
28  
29  
30  
31  
32  
33  
34  
35  
36  
37  
38  
39  
40  
41  
42  
43  
44  
45  
46  
47  
48  
49  
50  
51  
52  
53  
54  
55  
56  
57  
58  
59  
60

For peer review only

**Abstract:**

**Introduction:** Temporary ileostomy is a valuable aid in reducing the severity of complications related to rectal cancer surgery. However, it is still unclear what is the best timing of its closure in relation to the feasibility of an adjuvant treatment, especially considering patient-reported outcomes and health system costs. The aim of the study is to compare the results of an early versus late closure strategy in patients with indication to adjuvant chemotherapy after resection for rectal cancer.

**Methods and analysis:** This is a prospective multicentre randomized trial, sponsored by *Rete Oncologica Piemonte e Valle d'Aosta* (Oncology Network of Piedmont and Aosta Valley - Italy). Patients undergone to rectal cancer surgery with temporary ileostomy, aged >18 years, without evidence of anastomotic leak and with indication to adjuvant chemotherapy will be enrolled in 28 Network centres. An early closure strategy (between 30 and 40 days from rectal surgery) will be compared to a late one (after the end of adjuvant therapy). Primary endpoint will be the compliance to adjuvant chemotherapy with and without ileostomy. Complications associated with stoma closure as well as quality of life, costs, and oncological outcomes will be assessed as secondary endpoints.

**Ethics and dissemination:** The trial will engage the Network professional teams in a common effort to improve the treatment of rectal cancer by ensuring the best results in relation to the most correct use of resources. It will take into consideration both the patients' point of view (patient-reported outcome) and the health system perspective (costs analysis). The study has been approved by the Ethical Review Board of *Città della Salute e della Scienza* Hospital in Turin (Italy). The results of the study will be disseminated by the Network website, medical conferences and peer-reviewed scientific journals.

**Trial registration:** ClinicalTrials ([www.clinicaltrials.gov](http://www.clinicaltrials.gov)) NCT04372992

**Keywords:** rectal cancer; temporary ileostomy; early closure; late closure; postoperative morbidity; adjuvant chemotherapy; randomized controlled trial.

**Strengths and limitations of the study:**

- The study will involve all the referral centres for the treatment of colorectal cancer in the north-western area of Italy in a joint effort to improve the quality of rectal cancer care.
- It will have a high external validity given the large multicentric territorial context and the pragmatic approach with large inclusion criteria.
- The results will be analysed taking into account both the point of view of patients (patient-reported outcome analysis) and the costs for the health system.
- The main weakness of the study is the relative rarity of the patient population that could slow the accrual rate.

## INTRODUCTION

The temporary ileostomy is effective in reducing the severity of anastomotic complications in anterior resections for tumours of the rectum at risk of dehiscence and is therefore widely used, particularly after radiotherapy treatment. (1) In patients with indication for adjuvant chemotherapy, current practice consists of closing the stoma after the end of treatment.

The prolonged presence of the stoma can however favour the onset of stoma-related complications, such as prolapse, parastomal hernia, mechanical ileus, high-flow dehydration, and damage to kidney function. Ostomy-related complications may require unscheduled hospitalizations and result in increased costs. (2) In addition, the presence of the stoma impacts on patients' quality of life, causing alteration of the body image and imposing changes in the daily routine, lifestyle, and sexual sphere. (3, 4) Therefore, early closure of the ileostomy has been proposed in patients without signs of postoperative fistula.

The early closure (within one month of surgery) of the temporary ileostomy resulted not inferior to late closure (over 12 weeks) in 2 randomized studies that evaluated postoperative complications as an outcome. (5, 6) Early closure saves days of life with ileostomy for the patient and costs related to ostomy care for the health system and could represent the most desirable and convenient choice. (7) It was also associated with better long-term functional results in a secondary analysis of a randomized study. (8) However, in patients with indication for adjuvant therapy, it is not known what the best timing is for closing the stoma (before the start, during or at the end of the treatment) in terms of therapy tolerability, quality of life and overall costs. (9)

Both a start date delayed more than 8 weeks from surgery (10) and a received dose <70% of that planned (11) have been reported to reduce the effectiveness of adjuvant therapy in colorectal cancer patients. The presence of a stoma or the consequences of its early closure may interfere with

1  
2  
3 an optimal delivery of chemotherapy. A recent multicentre retrospective study reported an increase  
4  
5 in gastrointestinal toxicity in chemo-treated patients with stoma, with significant reduction in  
6  
7 treatment compliance. (12) On the other hand, early closure of the stoma could reveal an anterior  
8  
9 resection syndrome (LARS) before chemotherapy, with a potential negative impact on the  
10  
11 tolerability of the treatment itself, (13) or delay its initiation due to postoperative complications.  
12  
13  
14  
15 (14)

16  
17 This randomized study aims to identify the best timing for the stoma closure in relation to adjuvant  
18  
19 therapy in terms of compliance to chemotherapy, complications, costs and quality of life (QoL).  
20  
21  
22  
23  
24  
25

## 26 **METHODS AND ANALYSIS**

27  
28 STOMAD is a multicentre open-label randomized phase III trial designed to evaluate the best timing  
29  
30 of the closure of temporary ileostomy in patients operated on for rectal cancer and with indication  
31  
32 for adjuvant chemotherapy.  
33  
34  
35  
36  
37  
38

### 39 **Objectives**

#### 40 41 1. Primary objective

- 42  
43 • To compare the compliance with adjuvant therapy between early and late closure of  
44  
45 temporary ileostomy.

46  
47 The compliance with adjuvant chemotherapy in relation to the timing of ileostomy closure  
48  
49 (before the start or after the end of treatment) will be assessed considering any therapeutic  
50  
51 delay or dose reduction compared to the initially planned.  
52  
53  
54

#### 55 56 2. Secondary objectives

57  
58 To compare patients with early and late closure of temporary ileostomy in terms of:

- 59  
60 • Surgical morbidity

- Chemotherapy toxicity
- Patient-reported quality of life
- Costs
- Progression free survival (PFS)
- Overall survival (OS)

### Target population and setting

Patients undergone to rectal resection (+/- neoadjuvant therapy) for cancer with protective ileostomy and candidates for adjuvant chemotherapy in the Centres for the treatment of colorectal neoplasms recognized by *Rete Oncologica Piemonte e Valle d'Aosta*.

The list of participating centres is reported in Table 1.

**Table 1. List of participating centres**

| Local PI           | Local trial manager                    | Centre                                                                                      | Location                          |
|--------------------|----------------------------------------|---------------------------------------------------------------------------------------------|-----------------------------------|
| Paolo Millo        | Elisa Ponte                            | AUSL Aosta – Surgical Unit – Parini Hospital                                                | Aosta                             |
| Mario Morino       | Massimiliano Mistrangelo               | AOU Città Salute e Scienza – Academic Surgical Unit – Molinette Hospital                    | Torino                            |
| Paolo De Paolis    | Mauro Santarelli                       | AOU Città Salute e Scienza – Surgical Unit – Molinette Hospital                             | Torino                            |
| Alessandro Ferrero | Paolo Massucco                         | AO Ordine Mauriziano – Surgical Unit – Umberto I Hospital (Coordinating centre)             | Torino                            |
| Maurizio Degiuli   | Rossella Reddavid                      | AOU S. Luigi Gonzaga – Academic Surgical Unit – S. Luigi Hospital                           | Orbassano (TO)                    |
| Roberto Saracco    | Francesco Tomaselli                    | ASL Città Torino – Surgical Unit – Martini Hospital                                         | Torino                            |
| Mauro Garino       | Simone Birolo                          | ASL TO3 – Surgical Unit – Infermi Hospital                                                  | Rivoli (TO)                       |
| Andrea Muratore    | Marcello Calabrò<br>Nicoletta Pipitone | ASL TO3 – Surgical Unit – Agnelli Hospital                                                  | Pinerolo (TO)                     |
| Lodovico Rosato    | Luca Panier Suffat                     | ASL TO4 – Surgical Unit – Civile Hospital                                                   | Ivrea (TO)                        |
| Eraldo Personnetaz | Monica Carrera                         | ASL TO4 – Surgical Unit – Ciriè Hospital                                                    | Ciriè (TO)                        |
| Pietro Cumbo       | Francesco Potente                      | ASL TO5 – Surgical Unit – S. Croce Hospital                                                 | Moncalieri (TO)                   |
| Felice Borghi      | Maria Carmela Giuffrida                | AO S. Croce e Carle – Surgical Unit – S. Croce Hospital                                     | Cuneo                             |
| Franco Bertolino   | Marco Brunetti                         | ASL CN1 – Surgical Unit – SS. Annunziata Hospital                                           | Savigliano (CN)                   |
| Andrea Gattolin    | Roberto Rimonda                        | ASL CN1 – Surgical Unit – Regina Montis Regalis Hospital                                    | Mondovì (CN)                      |
| Marco Calgaro      | Vincenzo Adamo                         | ASL CN2 – Surgical Unit – S. Lazzaro Hospital                                               | Alba (CN)                         |
| Fabio Priora       | Igor Monsellato<br>Domenico Piscioneri | AO SS. Antonio e Biagio e Cesare Arrigo - Surgical Unit – SS. Antonio e Biagio Hospital     | Alessandria                       |
| Marco Amisano      | Francesco Cravero                      | ASL AL – Surgical Unit – S. Spirito Hospital                                                | Casale Monf.to (AL)               |
| Alberto Serventi   | Alberto Serventi                       | ASL AL – Surgical Unit – Mons. Galliano Hospital                                            | Acqui Terme (AL)                  |
| Carmine Di Somma   | Eliana Giaminardi                      | ASL AL – Surgical Unit – S. Giacomo Hospital                                                | Novi Ligure (AL)                  |
| Vincenzo Sorisio   | Luca Mazza                             | ASL AT – Surgical Unit – Cardinal Massaia Hospital                                          | Asti                              |
| Sergio Gentilli    | Paolo Bellora                          | AOU Maggiore Carità – Academic Surgical Unit – Maggiore Hospital                            | Novara                            |
| Raffaele Romito    | Fabio Colli                            | AOU Maggiore Carità – Surgical Unit – Maggiore Hospital                                     | Novara                            |
| Roberto Polastri   | Roderto Perinotti                      | ASL BI – Surgical Unit – Infermi Hospital                                                   | Biella                            |
| Silvio Testa       | Clemente De Rosa                       | ASL VC – Surgical Unit – S. Andrea Hospital                                                 | Vercelli                          |
| Sandro Zonta       | Francesco Battafarano<br>Renza Trapani | ASL VCO – Surgical Unit – S. Biagio Hospital<br>ASL VCO – Surgical Unit – Castelli Hospital | Domodossola (VB)<br>Verbania (VB) |
| Dario Ribero       | Alfredo Mellano                        | FPO – Colorectal Surgical Unit – IRCCS                                                      | Candiolo (TO)                     |
| Renzo Leli         | Paola Bellomo                          | Surgical Unit – Humanitas Gradenigo Hospital                                                | Torino                            |
| Carlo Bima         | Enrico Gibin                           | Surgical Unit – Cottolengo Hospital                                                         | Torino                            |

## Enrolment

### Inclusion criteria

- Patients undergone to radical intestinal resection (R0) for rectal neoplasia with protective ileostomy.
- Age  $\geq$  18 years.
- Absence of fistula (enema and/or endoscopy)

1  
2  
3 - Indication to adjuvant chemotherapy  
4

5 - Informed consent  
6  
7

8 Exclusion criteria  
9

10 - ASA >3  
11

12 - UICC stage IV  
13

14 - ECOG Performance Status  $\geq 2$   
15

16 - Severe and non-controlled systemic, oncologic, or infectious disease  
17  
18

19  
20 Before enrolment, the patient shall not show signs of ongoing complications. The integrity of the  
21 colorectal anastomosis will be confirmed with an enema and/or endoscopy according to local  
22 standards starting 15 days after surgery.  
23  
24

25  
26 The presence of a discontinuation of the anastomotic rhyme in endoscopy or of a spreading of any  
27 entity of the contrast medium on the enema will represent an exclusion criterion. All patients will  
28 simultaneously perform an oncological evaluation to establish the indication for adjuvant therapy  
29 in the presence of the definitive histological examination. Patients without signs of anastomotic  
30 complications and with indication for adjuvant therapy will be enrolled for study by the local  
31 investigators. Enrolment and randomization must take place within 21 days of the intervention.  
32  
33

34  
35 The subjects who are eligible for the study, after the informed consent has been signed, will be  
36 stratified by previous neoadjuvant treatment (yes or no) and by the proposed adjuvant  
37 chemotherapy scheme (with or without platinum derivatives), and then randomized to one of the  
38 following arms:  
39  
40

41  
42 - Arm A (experimental): closure of the stoma between 30 and 40 days after surgery on the rectum,  
43 before starting adjuvant therapy.  
44  
45  
46  
47  
48  
49  
50  
51  
52  
53  
54  
55  
56  
57  
58  
59  
60

1  
2  
3 - Arm B (standard): closure of the stoma starting from 15 days and within 60 days from the end of  
4  
5 the adjuvant therapy. The anastomosis instrumental evaluation will be repeated after the end of  
6  
7 chemotherapy in this group.  
8  
9

### 10 11 12 **Endpoint definition**

#### 13 14 15 1. Primary endpoint.

16  
17 Proportion of patients with adequate compliance with adjuvant treatment.

18  
19 Compliance with adjuvant therapy will be considered adequate if both of the following  
20  
21 criteria are met:  
22

- 23 • start of adjuvant therapy within the 70th day ( $\leq 10$  weeks) after surgery on the rectum;

24  
25 and

- 26 • total cumulative dose delivered, compared to the theoretical planned,  $\geq 70\%$ .

27  
28 Failure to adhere to at least 1 of the two criteria will correspond to a failure (inadequate  
29  
30 compliance). Patients with missing or non-performed assessment of compliance for any  
31  
32 reason will also be considered unsuccessful adherence.  
33  
34

#### 35 36 37 2. Secondary endpoints.

- 38 • Morbidity. Incidence of complications related to the presence or to the closure of the  
39  
40 ileostomy, during hospitalization or after discharge, using the Clavien-Dindo classification.

41  
42 Individual patient events, hospitalizations and reoperations will be recorded.

- 43 • Chemotherapy toxicity. All adverse events according to CTCAE version 5.0 classification will  
44  
45 be considered.

- 46 • QoL. Patient-reported quality of life will be measured at the baseline and at defined time  
47  
48 points using validated questionnaires (EORTC C30 and CR29, EQ5D). Bowel function will be  
49  
50 evaluated at 12 months from randomization by means of the LARS score.  
51  
52  
53  
54  
55  
56  
57  
58  
59  
60



- Costs. The costs related to hospitalization, outpatient visits, ostomy care supplies and the management of complications and toxicity will be assessed.
- Progression free survival (PFS), defined as the time elapsed between the randomization date and the date of progression/death for any cause or the latest follow up available.
- Overall survival (OS), defined as the time elapsed between the randomization date and the date of death for any cause or the latest follow up available

Patients will be followed for the duration of the study, regardless of the clinical course, and will conclude the active follow-up with a final evaluation 12 months after randomization in both study arms. A longer follow-up, based only on routinely recorded data, will be conducted to assess long term overall survival. Enrolment is expected to start in September 2020.

The study flow diagram is depicted in Figure 1.

### **Surgical technique and medical therapy**

Hospitalization will normally take place the day before or the morning of surgery. Antibiotic-prophylaxis (usually short-term with cefazoline within half an hour after skin incision) and thromboembolic prophylaxis will be performed according to national guidelines.

The stoma closure will be performed manually or mechanically according to the surgeon's judgment.

The suture of the skin incision will be linear or purse-string according to the local standards.

The postoperative management will be based on the ERAS strategy (early feeding and mobilization).

Discharge criteria will be passage of gas, adequate oral feeding, and good pain control.

Adjuvant chemotherapy will be administered, in terms of indications, drugs and schedules, according to the national guidelines (AIOM) and according to the consensus documents of the

Colorectal Study Group of the Oncology Network (<http://www.reteoncologica.it/area-operatori/gruppi-per-patologie/raccomandazioni-di-rete>).

1  
2  
3 The ideal temporal target for the start of chemotherapy will be within 8 weeks of surgery on the  
4  
5 rectum; the maximum time within 10 weeks. Randomized patients starting after this term are still  
6  
7 followed up and evaluated until the end of follow-up for the evaluation of the other endpoints.  
8  
9

## 10 11 12 **Endpoints assessment and follow-up**

### 13 14 15 1. Morbidity

16  
17 Complications related to stoma closure surgery, which occurred both during and after  
18  
19 hospitalization, will be recorded according to the Clavien-Dindo classification. Their overall weight  
20  
21 per patient will be calculated through the CCI. Management problems and complications from the  
22  
23 stoma presence will also be recorded. All reinterventions and hospitalizations during the study  
24  
25 period will be captured.  
26  
27  
28

### 29 30 2. Adjuvant therapy

31  
32 Chemotherapy toxicity will be evaluated according to the CTC-EORTC. Prophylaxis and treatment of  
33  
34 side effects and dose reductions will be applied according to international standards (NCI-CTCAE  
35  
36 criteria). Starting date of the treatment, dose reductions and therapeutic scheme variations,  
37  
38 suspensions or interruptions will be recorded. In relation to the total dose and the total number of  
39  
40 programmed cycles, the percentage of completeness of the adjuvant therapy will be calculated.  
41  
42 Grade and type of adjuvant therapy toxicity will be recorded for each patient.  
43  
44  
45  
46

### 47 48 3. QoL

49  
50 Quality of life will be measured using the EORTC C30, CR29 and EQ5D validated questionnaires. The  
51  
52 questionnaires will be administered, in both arms, upon enrolment (baseline), at the beginning of  
53  
54 the 4th cycle of adjuvant therapy and at 12 months after the intervention on rectal cancer.

55  
56 The LARS score will be used to evaluate intestinal and sphincter function at 12 months after the  
57  
58 rectal intervention in both arms (in the control group if ostomy closed since at least 2 months).  
59  
60

#### 4. Costs

The costs will be estimated considering the days of hospitalization related to the closure of the stoma, the treatment of complications or toxicity, the outpatient visits during the study period and the amount of supplies for stoma care. Regional averages costs will be used as the basic cost unit.

#### Statistical considerations

##### 1. Sample size

The sample size was calculated in relation to the main objective. The null hypothesis (proportion of patients with adequate compliance to the adjuvant treatment in patients with closure of the stoma after treatment) was inferred from data of randomized trials of adjuvant chemotherapy after rectal cancer resection (15, 16) and studies on chemotherapy toxicity directly related to the presence of an ostomy (12), and was set at 0.70. The alternative hypothesis is an increase in the proportion up to 0.85, with an absolute increase of 0.15. This increase is considered clinically relevant. With a two-tailed alpha error of 0.05 and a power of 0.80, the sample size required is at least 242 patients (121 for each treatment arm). Taking into account a maximum drop-out rate of approximately 10%, the total number of patients enrolled and randomized will be 270. The estimated study duration is 36 months.

##### 2. Randomization

The randomization list, stratified by neoadjuvant therapy (yes/no) and by type of planned adjuvant chemotherapy (fluoropyrimidine +/- platinum derivatives) will be generated by the Clinical Epidemiology Unit of *Città della Salute e della Scienza* University Hospital in Turin, using a block procedure of variable length in random order, completely concealed to clinicians. The 1:1 randomization will be done online. After entering the inclusion/exclusion criteria and the

1  
2  
3 stratification variables into the database, the patient will be randomized and registered in arm A or  
4  
5 B. The computerized randomization system will be accessible continuously.  
6  
7

### 8 3. Analysis 9

10 The principal analyses will be carried out on all subjects randomized according to the assigned  
11 treatment arm (intention to treat principle). The demographic and baseline characteristics will be  
12 described for the whole study population and for each treatment arm. Discrete variables will be  
13 summarized by frequencies and percentages. The continuous variables will be summarized with the  
14 use of standard measures of central tendency and dispersion (mean and standard deviation or  
15 median deviation and interquartile range). The analysis of the primary endpoint will be based on  
16 the comparison of treatment compliance between the two arms by means of a stratified chi-square  
17 test. As a sensitivity analysis, further potential confounders detected at the baseline will be included  
18 in a logistic regression model. OS and PFS, calculated from the randomization date, will be assessed  
19 with the Kaplan-Meier method and the differences in survival (overall and disease-free) will be  
20 tested using the stratified Log-rank test. The 95% confidence intervals (95% CI) will be calculated for  
21 all the study endpoints. Hazard Ratios (HR), adjusted for the stratification criteria and the main  
22 prognostic factors, will be estimated using the Cox model. Planned subgroup analyses will be carried  
23 out for the two stratification factors of the randomization (neoadjuvant treatment and adjuvant  
24 chemotherapy) and by age (divided into 3 classes according to the tertiles) using interaction terms  
25 between treatment arm and the subgroup variable in the regression models. Multiplicity  
26 adjustments for secondary outcomes and subgroup analyses will not be performed because these  
27 results will be considered exploratory and no claims will be made on them. The incidence of  
28 individual adverse events during hospitalization will be compared using the chi square test or the  
29 exact Fischer test, as appropriate. The comparison on the quality of life will be evaluated by  
30 comparing the average score between the two groups with the Student's T test (or with a non-  
31  
32  
33  
34  
35  
36  
37  
38  
39  
40  
41  
42  
43  
44  
45  
46  
47  
48  
49  
50  
51  
52  
53  
54  
55  
56  
57  
58  
59  
60

1  
2  
3 parametric test and quartile regression, if necessary) and with generalized linear mixed model to  
4  
5 take into account the repeated measurements over time on the same subjects. Per protocol  
6  
7 analyses will be performed for exploratory purposes.  
8  
9

### 10 11 12 13 **Data collection**

14  
15 The data will be collected in each participating centre by filling in an electronic CRF (eCRF). A local  
16  
17 study manager will be identified for each participating centre. The completeness and congruity of  
18  
19 the data will be checked periodically by a central study monitor and overviewed the study's Steering  
20  
21 Committee. The central monitor and Steering Committee will refer to the local managers for any  
22  
23 request for clarification.  
24  
25  
26  
27  
28  
29

### 30 31 **ETHICS AND DISSEMINATION**

32  
33 The *Rete Oncologica Piemonte e Valle d'Aosta* is a multidisciplinary organization that includes  
34  
35 specialists involved in the treatment of cancer disease in the north-western territory of Italy. The  
36  
37 aim of the Oncology Network is to reduce the variability of treatments, guarantee uniform access  
38  
39 to and improve the quality of cancer care. To this end, the Network issues recommendations,  
40  
41 drafted through a peer review process by its members, and defines the criteria for the designation  
42  
43 as referral centres for cancer specific procedures.  
44  
45  
46  
47

48 STOMAD is a non-profit study conducted within the Network centres and is part of the research  
49  
50 branch aimed at improving the healthcare delivery system. It is proposed to investigate which is the  
51  
52 best adjuvant treatment delivery strategy in relation to the presence of the stoma for patients  
53  
54 operated on for rectal cancer, taking into consideration both the patient's point of view (patients  
55  
56 reported outcome) and the health system perspective (costs analysis).  
57  
58  
59  
60

1  
2  
3 The study will be conducted according to the principles of the Helsinki Declaration and the ICH  
4  
5 Guideline for Good Clinical Practice. It will be approved by the reference Ethics Committee of each  
6  
7 participating centre. Each enrolled patient must express a written consent (the consent form in  
8  
9 original language is provided as Supplemental Material). Consent can be revoked at any time.  
10  
11 Patients data will be collected on an existing online platform created by the Clinical Epidemiology  
12  
13 Unit of the main centre in the region, which will also be responsible for all statistical analyses. The  
14  
15 data collected for the study will be processed in accordance with current national legislation  
16  
17 (Personal Data Protection Code). The trial Steering Committee may request the premature  
18  
19 termination of the study in case of adverse events with severity and frequency significantly higher  
20  
21 than expected or if the primary end point in the experimental group is significantly worse than the  
22  
23 control group before the end of the study. For these evaluations, the Steering Committee will not  
24  
25 use pre-defined statistical criteria (statistical stopping rules) but will base the decision on a careful  
26  
27 quantitative and qualitative evaluation of the events that will be discussed in scheduled meetings.  
28  
29 This trial will engage the Network professional teams in a common effort to improve the treatment  
30  
31 of rectal cancer by ensuring the best results in relation to the most correct use of resources (value-  
32  
33 based health care). Other positive effects could be the strengthening of collaboration relationships  
34  
35 between the Network centres and the definition of a common platform for future Network research.  
36  
37 The results of this study will be presented at national and international meetings and reported in  
38  
39 the Network website. A manuscript with the final results will be submitted for publication in a peer-  
40  
41 reviewed journal.  
42  
43  
44  
45  
46  
47  
48  
49  
50  
51  
52  
53  
54  
55  
56  
57  
58  
59  
60

1  
2  
3  
4  
5  
6 **Abbreviations:**

7 **AIOM:** Associazione Italiana Oncologia Medica

8 **ERAS:** Enhanced Recovery After Surgery protocol

9 **ASA:** American Society of Anesthesiologists

10 **ECOG PS:** Eastern Cooperative Oncology Group – Performance Status

11 **UICC:** Union for International Cancer Control

12 **CCI:** Comprehensive Complication Index

13 **CTC-EORTC:** Common Toxicity Criteria – European Organization for Research and Treatment of  
14 Cancer

15 **NCI-CTCAE:** National Cancer Institute – Common Terminology Criteria for Adverse Events

16 **OS:** Overall survival

17 **PFS:** Progression Free Survival

18 **QoL:** Quality of Life

19 **LARS:** Low Anterior Resection Syndrome

20 **e-CRF:** electronic Case Report Form

21 **ICH:** International Council for Harmonization of Technical Requirements for Registration of  
22 Pharmaceuticals for Human Use

23  
24  
25  
26  
27  
28  
29 **Figure legend:**

30 **Figure 1. Study flow diagram**

31  
32  
33  
34  
35  
36  
37  
38  
39  
40  
41  
42  
43  
44  
45  
46  
47  
48  
49  
50  
51  
52  
53  
54  
55  
56  
57  
58  
59  
60

## REFERENCES

1. Montedori A, Cirocchi R, Farinella E, et al. Covering ileo- or colostomy in anterior resection for rectal carcinoma. *Cochrane Database Syst Rev*. 2010 May; 12(5).
2. Malik T, Lee MJ, Harikrishnan AB. The incidence of stoma related morbidity - a systematic review of randomised controlled trials. *Ann R Coll Surg Engl*. 2018 Sep; 100(7):501-508.
3. Brown H, Randle J. Living with a stoma: a review of the literature. *J Clin Nurs* 2005; 14:74-81.
4. Herrle F, Sandra-Petrescu F, Weiss C, Post S, Runkel N, Kienle P. Quality of Life and Timing of Stoma Closure in Patients With Rectal Cancer Undergoing Low Anterior Resection With Diverting Stoma: A Multicenter Longitudinal Observational Study. *Dis Colon Rectum*. 2016 Apr; 59(4):281-90.
5. Alves A, Panis Y, Lelong B, Dousset B, Benoist S, Vicaut E. Randomized clinical trial of early versus delayed temporary stoma closure after proctectomy. *Br J Surg*. 2008 Jun; 95(6):693-8.
6. Danielsen AK, Park J, Jansen JE, Bock D, Skullman S, Wedin A, Marinez AC, Haglind E, Angenete E, Rosenberg J, Haglind E, Angenete E, Rosenberg J. Early Closure of a Temporary Ileostomy in Patients With Rectal Cancer: A Multicenter Randomized Controlled Trial. *Ann Surg*. 2017 Feb; 265(2):284-290.
7. Park J, Angenete E, Bock D, Correa-Marinez A, Danielsen AK, Gehrman J, Haglind E, Jansen JE, Skullman S, Wedin A, Rosenberg J. Cost analysis in a randomized trial of early closure of a temporary ileostomy after rectal resection for cancer (EASY trial). *Surg Endosc*. 2019 Jan; 34(1):69-76
8. Keane C, Park J, Öberg S, Wedin A, Bock D, O'Grady G, Bissett I, Rosenberg J, Angenete E. Functional outcomes from a randomized trial of early closure of temporary ileostomy after rectal excision for cancer. *Br J Surg*. 2019 Apr; 106(5):645-652.
9. Tulchinsky H, Shacham-Shmueli E, Klausner JM, Inbar M, Geva R. Should a loop ileostomy closure in rectal cancer patients be done during or after adjuvant chemotherapy? *J Surg Oncol*. 2014 Mar; 109(3):266-9.
10. Biagi JJ, Raphael MJ, Mackillop WJ, Kong W, King WD, Booth CM. Association Between Time to Initiation of Adjuvant Chemotherapy and Survival in Colorectal Cancer. A Systematic Review and Meta-analysis. *JAMA*. 2011 Jun 8; 305(22):2335-42.
11. Aspinall SL, Good CB, Zhao X, et al. Adjuvant chemotherapy for stage III colon cancer: relative dose intensity and survival among veterans. *BMC Cancer*. 2015; 15:62.
12. Robertson JP, Wells CI, Vather R, Bissett IP. Effect of Diversion Ileostomy on the Occurrence and Consequences of Chemotherapy-Induced Diarrhea. *Dis Colon Rectum*. 2016 Mar; 59(3):194-200.
13. Siassi M, Hohenberger W, Losel F, et al. Quality of life and patient's expectations after closure of a temporary stoma. *Int J Colorectal Dis*. 2008 Dec; 23(12):1207-12.
14. Chow A, Tilney HS, Paraskeva P, et al. The morbidity surrounding reversal of defunctioning ileostomies: a systematic review of 48 studies including 6,107 cases. *Int J Colorectal Dis*. 2009 Jun; 24(6):711-23.
15. Hofheinz RD, Wenz F, Post S, et al. Chemoradiotherapy with capecitabine versus fluorouracil for locally advanced rectal cancer: a randomised, multicentre, non-inferiority, phase 3 trial. *Lancet Oncol*. 2012 Jun;13(6):579-88.



- 1  
2  
3 16. Glynne-Jones R, Counsell N, Quirke P, et al. Chronicle: results of a randomised phase III trial in locally  
4 advanced rectal cancer after neoadjuvant chemoradiation randomising postoperative adjuvant  
5 capecitabine plus oxaliplatin (XELOX) versus control. *Ann Oncol*. 2014 Jul;25(7):1356-1362.  
6  
7  
8  
9

### 10 **Declarations:**

### 11 **Authors' contributions**

12 PM proposed the conception and design of the study protocol. AF, MM, SP, GC, CG, MCG, DM,  
13 IM, MKP, RP, PR, CM and FS contributed to the initial conception, design, and the drafting of the  
14 protocol and represent the trial Steering Committee. EP, MM, MS, FT, RR, SB, MC, NP, LPS, MC,  
15 FP, MB, RR, VA, DP, FC1, AS, EG1, LM, PB1, FC2, CDR, FB, RT, AM, EG2 and PB2 evaluated and  
16 approved the protocol and will be responsible for local patient accrual and data registration. All  
17 authors have approved the final submitted manuscript.  
18  
19  
20

### 21 **Acknowledgements**

22 A special acknowledgment goes to the Director of *Rete Oncologica Piemonte e Valle d'Aosta*, Dr.  
23 O. Bertetto, for his support to this multicentre protocol and to Drs. F. Saccona and M. Abdallah  
24 for the elaboration of the on-line platform.  
25  
26  
27

### 28 **Ethics approval**

29 The study has been approved by the Ethical Review Board of *Azienda Ospedaliera Universitaria*  
30 *Città della Salute e della Scienza*, Turin (Italy).  
31  
32

### 33 **Funding**

34 STOMAD is a non-profit clinical trial sponsored by *Rete Oncologica Piemonte e Valle d'Aosta*,  
35 Italy (<http://www.reteoncologica.it/>). It will not receive external funding.  
36  
37

### 38 **Competing interests**

39 The authors declare that they have no competing interests.  
40  
41

### 42 **Data availability**

43 Anonymized trail data will be available for 36 months after the results publication upon request  
44 to the principal investigator. Data will be provided in electronic dataset format containing  
45 deidentified participant files by the Unit of Epidemiology of the *Azienda Ospedaliera*  
46 *Universitaria Città della Salute e della Scienza*, Turin (Italy) after evaluation and approval of the  
47 request by the trial steering committee.  
48  
49

### 50 **Patients and Public involvement**

51 Patients organizations were not involved in the conception and drafting of the trial. However, the  
52 endpoints were specifically designed to include patient-reported outcomes and validated quality  
53 of life questionnaires will be applied throughout the trial timeline.  
54  
55

### 56 **ORCID iD**

57 Paolo Massucco <https://orcid.org/0000-0003-1620-0464>  
58  
59  
60

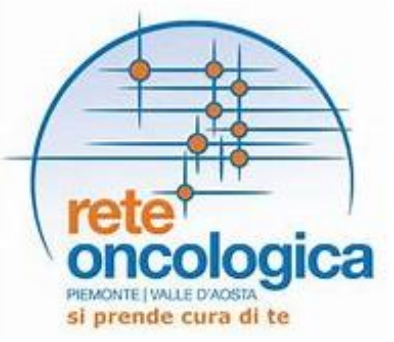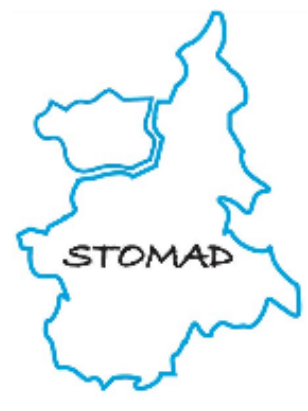

**Patient Population**  
Curative resection for rectal neoplasm with temporary ileostomy and indication to adjuvant therapy

ACCRUAL

- EXCLUSION CRITERIA**
- ASA >3
  - IV stage
  - ECOG Performance Status >=2
  - Severe non-controlled systemic, oncological or infectious disease

INCLUSION/EXCLUSION CRITERIA EVALUATION

- INCLUSION CRITERIA**
- >= 18 years
  - No fistula (enema and/or endoscopy)
  - Indication to adjuvant therapy
  - Consent signed

ENDOSCOPY/ENEMA

ANASTOMOTIC LEAK

**RANDOMIZATION**

TREATMENT

ARM A  
experimental

ARM B  
standard

EARLY ILEOSTOMY CLOSURE

ADJUVANT THERAPY

ADJUVANT THERAPY

ENDOSCOPY/ENEMA

ANASTOMOTIC LEAK

FOLLOW - UP

FOLLOW UP  
(12 months from randomization)

FOLLOW UP  
(12 months from randomization)

DATA ANALYSIS

LOST TO FOLLOW UP

**FINAL ANALYSIS**  
 Primary endpoint: adjuvant therapy compliance  
 Secondary endpoints: complications, costs, QoL, oncological outcome

Su carta intestata del centro partecipante

## **FOGLIO INFORMATIVO E MODULO DI CONSENSO INFORMATO PER IL PAZIENTE**

**Studio prospettico randomizzato sul timing di chiusura dell'ileostomia temporanea nei pazienti operati per neoplasia rettale e con indicazione a chemioterapia adiuvante.**  
**The STOMa closure before or after ADjuvant therapy trial - STOMAD TRIAL**

Gentile Signore/a,

Le è stato chiesto di partecipare ad una sperimentazione clinica, promossa dalla Rete Oncologica Piemonte e Valle d'Aosta.

I ricercatori studiano i casi come il suo, al fine di migliorare i metodi diagnostici, le terapie e la cura. Questo tipo di approccio si definisce ricerca clinica.

Prima di dare il Suo consenso a partecipare a questo studio, è bene che Lei sia a conoscenza dei rischi e dei benefici ad esso correlati. La Sua partecipazione a questa ricerca è assolutamente volontaria e Le sarà concesso il tempo sufficiente per decidere se partecipare. Questo processo è noto con il nome di consenso informato.

Nelle pagine seguenti, troverà i dettagli della sperimentazione clinica, di cui potrà discutere con il Suo medico. Le raccomandiamo di leggere queste informazioni con attenzione. Se c'è qualcosa che non capisce o di cui desidererebbe sapere di più, non esiti a chiederlo.

Prima di decidere di partecipare, Le consigliamo di parlarne con un familiare, un amico o il Suo medico di medicina generale.

Quando avrà compreso la natura dello studio clinico e se desidera parteciparvi, Le chiederemo di firmare il modulo per il consenso informato del paziente. Le sarà consegnata una copia del presente foglio informativo e del modulo per il consenso informato del paziente, che Le consigliamo di conservare.

### **Finalità della ricerca e Descrizione della sperimentazione clinica**

La invitiamo a prendere parte a questo studio in quanto Le è stato diagnosticato un tumore rettale, per il quale è stato trattato con un intervento chirurgico di resezione rettale con confezione di una ileostomia.

Nei pazienti che, come lei, devono essere sottoposti a successiva chemioterapia adiuvante, l'attuale prassi prevede la chiusura della stomia dopo il termine del trattamento farmacologico, il che avviene in genere dopo almeno 3 mesi dall'intervento.

E' stato rilevato però che la presenza prolungata della stomia può favorire l'insorgenza di complicanze che potrebbero richiedere anche un secondo ricovero. La presenza della stomia inoltre incide sulla qualità di vita imponendo cambiamenti importanti nella routine quotidiana, nello stile di vita e nella sfera sessuale.

Su carta intestata del centro partecipante

1  
2  
3 Alcuni studi hanno dimostrato che la chiusura precoce dell'ileostomia è altrettanto  
4 sicura rispetto alla chiusura tardiva e quindi preferibile sia dal punto di vista del  
5 paziente che per quanto riguarda la spesa sanitaria.

6  
7 Non è tuttavia ancora noto quale sia il momento migliore per chiudere la stomia in  
8 relazione alla tollerabilità della chemioterapia.

9  
10 Per dirimere tale quesito, questo studio prevede di coinvolgere i pazienti operati per  
11 tumore del retto nei centri della Rete Oncologica Piemonte e Valle d'Aosta. Lo studio  
12 prevede per metà dei partecipanti la chiusura della stomia a 30-40 giorni dall'intervento  
13 (gruppo di studio) e per l'altra metà a circa 15 gg dal termine della terapia adiuvante  
14 (gruppo di controllo).

15  
16 L'assegnazione dei pazienti ad un gruppo o all'altro non è a discrezione degli  
17 sperimentatori, ma avviene attraverso un meccanismo computerizzato casuale  
18 chiamato randomizzazione.

19  
20 Il presente studio clinico è condotto ai sensi del diritto nazionale applicabile e delle  
21 linee guida internazionali, ed è stato approvato dal Comitato Etico del centro  
22 coordinatore (AO Ordine Mauriziano - Torino), nonché dal Comitato Etico Indipendente  
23 del Suo centro.  
24  
25

### 26 27 **Sono tenuto a prendere parte a questo progetto di ricerca?**

28  
29 La Sua partecipazione a questo studio di ricerca è assolutamente volontaria. Se  
30 dovesse decidere di non partecipare, non ci sarà alcuna ripercussione sulla sua  
31 assistenza medica. Qualora cominciasse lo studio, avrà la possibilità di ritirarsi in  
32 qualsiasi momento e senza doverne specificare la ragione. Questa decisione non  
33 influirà in alcun modo sull'assistenza medica futura.

34  
35 Qualora si dovesse ritirare dallo studio, solo i dati già raccolti saranno usati ai fini  
36 dell'analisi. Qualora dovesse ritirare il consenso ma dare la Sua approvazione, il Suo  
37 medico di riferimento per lo studio potrà raccogliere informazioni sul Suo stato di salute  
38 da fonti disponibili quali ad esempio cartelle cliniche o registri pubblici.  
39  
40  
41

### 42 43 **Quali sono le alternative alla mia partecipazione?**

44  
45 Qualora Lei decidesse di non prendere parte al presente studio, lei verrà trattato  
46 secondo la attuale pratica clinica che prevede la chiusura della stomia al termine della  
47 chemioterapia adiuvante.  
48  
49

### 50 51 **Procedure**

52  
53 Una volta firmato il modulo di consenso informato il medico svolgerà le  
54 opportune valutazioni per assicurarsi della Sua idoneità alla partecipazione allo studio.  
55 All'atto dell'arruolamento le sarà chiesto di compilare un Questionario atto a valutare  
56 la qualità di vita (QoL).

57  
58 Il personale le chiederà di compilare dei questionari simili in altri due diversi momenti  
59 del percorso di cura:  
60

Su carta intestata del centro partecipante

- al quarto ciclo del programma di chemioterapia;
- dopo circa 12 mesi dall'intervento.

### **Visite ed esami previsti nel corso della terapia di studio**

Dal momento che la Sua partecipazione allo studio si inserisce nella cura della Sua problematica clinica, le visite e gli esami previsti fanno parte del normale approccio terapeutico garantito dal suo ospedale.

### **Quali sono i possibili benefici della partecipazione allo studio?**

Ad oggi non è possibile sapere quale sia il momento migliore per la chiusura della stomia, quindi non è certo che questo studio possa darLe un beneficio diretto. Questa ricerca però, aiuterà i ricercatori a comprendere la migliore strategia di trattamento chirurgico per aiutare altri pazienti con la Sua stessa malattia in futuro.

### **Quali sono i possibili rischi legati alla partecipazione allo studio?**

Lo studio non comporta rischi aggiuntivi rispetto alla corrente pratica clinica per i pazienti che rientreranno nel gruppo di studio, in quanto trattasi di tecnica chirurgica comunemente utilizzata.

### **Qual è il costo per la partecipazione allo studio?**

Tutte le spese, ad esempio gli esami standard di routine, saranno gestiti come se Lei stesse ricevendo un'assistenza medica normale, senza partecipare ad alcun studio clinico. Non Le saranno addebitati costi aggiuntivi. La partecipazione al presente studio non è retribuita.

### **Che cosa succederà alle informazioni che mi riguardano?**

I ricercatori dovranno raccogliere informazioni personali quali l'età, il sesso e le altre informazioni mediche richieste. Tutte le informazioni relative alla raccolta dei Suoi dati personali saranno cifrate in modo tale che senza una chiave non sarà possibile farle risalire alla persona interessata.

Qualsiasi informazione personale o medica raccolta sarà strettamente privata e riservata. La conservazione delle informazioni avverrà in modo sicuro. Solo le persone autorizzate potranno accedervi, in quanto perfettamente al corrente della loro natura strettamente riservata. Né il Suo nome né qualsiasi altra informazione identificativa compariranno in alcun rapporto di studio reso disponibile al pubblico.

I rappresentanti del promotore dello studio (Rete Oncologica Piemonte e Valle d'Aosta), le agenzie per i farmaci o i Comitati Etici potranno richiedere l'accesso alle informazioni personali o mediche contenute nella Sua cartella clinica, al fine di verificare le procedure e/o i dati di studio. In caso di sinistri relativi a problemi o danni

Su carta intestata del centro partecipante

1  
2  
3 medici, anche i rappresentanti dell'assicurazione avranno accesso ai Suoi dati medici  
4 attraverso il Suo ricercatore e solo nella misura necessaria per la gestione del sinistro.  
5 Il promotore dello studio garantisce il rispetto delle linee guida nazionali e internazionali  
6 sulla protezione dei dati.  
7

8 I Suoi dati personali saranno trattati, nei limiti e con le modalità indicate nel presente  
9 documento e in conformità al Codice in Materia di Protezione dei Dati Personali (D.Lgs  
10 196 del 30/06/2003) e al Regolamento (UE) 2016/679 sulla protezione dei dati  
11 personali (GDPR).  
12  
13  
14

### 15 **Cosa succederebbe se dovessero sorgere nuove informazioni durante lo** 16 **studio?** 17

18  
19 Lei ha il diritto di essere informato dei progressi dello studio di ricerca e dei suoi risultati  
20 finali. Inoltre, ha il diritto di essere informato riguardo a eventuali altri risultati di altri  
21 studi che potrebbero rivelarsi importanti per il Suo trattamento o influire sulla Sua  
22 disponibilità a proseguire questo studio.  
23  
24

### 25 **A chi devo rivolgermi in caso di dubbi?** 26

27  
28 Se ha bisogno di ulteriori informazioni su questo studio prima di decidere di  
29 parteciparvi, si rivolga al Suo medico di riferimento per lo studio. Qualora dovesse  
30 decidere di partecipare, si rivolga allo stesso medico di riferimento qualora si  
31 verificassero gravi effetti indesiderati causati dalla terapia.  
32  
33  
34

35  
36 Responsabile locale per lo studio – Dott: .....

37 Recapito: .....  
38  
39  
40  
41  
42  
43  
44  
45  
46  
47  
48  
49  
50  
51  
52  
53  
54  
55  
56  
57  
58  
59  
60

Su carta intestata del centro partecipante

**CONSENSO INFORMATO DEL PAZIENTE ALLA PARTECIPAZIONE ALLA  
SPERIMENTAZIONE CLINICA**

**Studio prospettico randomizzato sul timing di chiusura dell'ileostomia temporanea nei pazienti operati per neoplasia rettale e con indicazione a chemioterapia adiuvante.**

**The stoma closure before or after adjuvant therapy trial - STOMAD TRIAL**

**DICHIARAZIONE DEL PAZIENTE**

Con la firma sottostante attesto che:

- Il medico citato di seguito mi ha spiegato oralmente e per iscritto gli obiettivi, la procedura dello studio, gli effetti attesi, i possibili vantaggi e svantaggi e i potenziali rischi. Se desidero ulteriori informazioni su questo studio, posso rivolgermi al medico dello studio.
- Ho letto e compreso il modulo di informazioni per i pazienti prodotto per questo studio. Le mie domande relative alla partecipazione allo studio hanno ricevuto una risposta soddisfacente. Posso conservare il modulo informativo e riceverò una copia del mio consenso informato firmato.
- Ho avuto tempo a sufficienza per prendere la mia decisione.
- La mia partecipazione a questo studio è volontaria. Posso ritirare la mia partecipazione in ogni momento senza addurre alcuna motivazione e senza nessuna ripercussione sulla prosecuzione dell'assistenza medica.
- Riceverò una copia del modulo di informazione del paziente e una copia del modulo di consenso firmato.

NOME E COGNOME \_\_\_\_\_

FIRMA \_\_\_\_\_ DATA: \_\_\_\_\_

Su carta intestata del centro partecipante

**TESTIMONE IMPARZIALE (Solo nel caso in cui il paziente non sia in grado di leggere o scrivere) – Compilare solo se applicabile**

Confermo di non essere in relazione con lo studio, di aver partecipato al processo del consenso e di aver letto le informazioni dello studio.

NOME E COGNOME

DEL TESTIMONE IMPARZIALE: \_\_\_\_\_

FIRMA

DEL TESTIMONE IMPARZIALE: \_\_\_\_\_ DATA: \_\_\_\_\_

**DICHIARAZIONE DEL MEDICO RICHIEDENTE IL CONSENSO INFORMATO**

Dichiaro di aver spiegato in modo esauriente il presente studio al paziente.

A mio giudizio e secondo il paziente le informazioni fornite, anche riguardo a rischi e benefici, sono state sufficienti per una decisione informata.

NOME E COGNOME DEL MEDICO CHE HA OTTENUTO IL CONSENSO:

\_\_\_\_\_

FIRMA DEL MEDICO CHE HA OTTENUTO IL CONSENSO:

\_\_\_\_\_

\_\_\_\_\_

DATA: \_\_\_\_\_



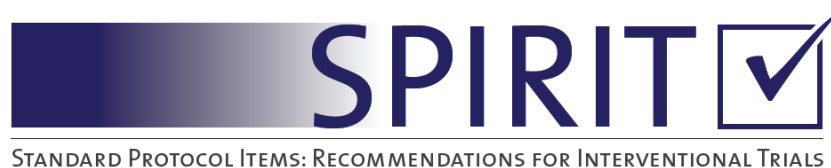

| Section/item                      | ItemNo | Description                                                                                                                                                                                                                                                                              | Addressed on page number |
|-----------------------------------|--------|------------------------------------------------------------------------------------------------------------------------------------------------------------------------------------------------------------------------------------------------------------------------------------------|--------------------------|
| <b>Administrative information</b> |        |                                                                                                                                                                                                                                                                                          |                          |
| Title                             | 1      | Descriptive title identifying the study design, population, interventions, and, if applicable, trial acronym                                                                                                                                                                             | 1                        |
| Trial registration                | 2a     | Trial identifier and registry name. If not yet registered, name of intended registry                                                                                                                                                                                                     | 1                        |
|                                   | 2b     | All items from the World Health Organization Trial Registration Data Set                                                                                                                                                                                                                 | 1                        |
| Protocol version                  | 3      | Date and version identifier                                                                                                                                                                                                                                                              | NA                       |
| Funding                           | 4      | Sources and types of financial, material, and other support                                                                                                                                                                                                                              | 17                       |
| Roles and responsibilities        | 5a     | Names, affiliations, and roles of protocol contributors                                                                                                                                                                                                                                  | 16                       |
|                                   | 5b     | Name and contact information for the trial sponsor                                                                                                                                                                                                                                       | 17                       |
|                                   | 5c     | Role of study sponsor and funders, if any, in study design; collection, management, analysis, and interpretation of data; writing of the report; and the decision to submit the report for publication, including whether they will have ultimate authority over any of these activities | NA                       |

1  
2  
3  
4  
5  
6  
7  
8  
9  
10  
11  
12  
13  
14  
15  
16  
17  
18  
19  
20  
21  
22  
23  
24  
25  
26  
27  
28  
29  
30  
31  
32  
33  
34  
35  
36  
37  
38  
39  
40  
41  
42  
43  
44  
45  
46

|  |    |                                                                                                                                                                                                                                                                  |    |
|--|----|------------------------------------------------------------------------------------------------------------------------------------------------------------------------------------------------------------------------------------------------------------------|----|
|  | 5d | Composition, roles, and responsibilities of the coordinating centre, steering committee, endpoint adjudication committee, data management team, and other individuals or groups overseeing the trial, if applicable (see Item 21a for data monitoring committee) | 16 |
|--|----|------------------------------------------------------------------------------------------------------------------------------------------------------------------------------------------------------------------------------------------------------------------|----|

## Introduction

|                          |    |                                                                                                                                                                                                           |   |
|--------------------------|----|-----------------------------------------------------------------------------------------------------------------------------------------------------------------------------------------------------------|---|
| Background and rationale | 6a | Description of research question and justification for undertaking the trial, including summary of relevant studies (published and unpublished) examining benefits and harms for each intervention        | 3 |
|                          | 6b | Explanation for choice of comparators                                                                                                                                                                     | 4 |
| Objectives               | 7  | Specific objectives or hypotheses                                                                                                                                                                         |   |
| Trial design             | 8  | Description of trial design including type of trial (eg, parallel group, crossover, factorial, single group), allocation ratio, and framework (eg, superiority, equivalence, noninferiority, exploratory) | 4 |

## Methods: Participants, interventions, and outcomes

|                      |     |                                                                                                                                                                                                |    |
|----------------------|-----|------------------------------------------------------------------------------------------------------------------------------------------------------------------------------------------------|----|
| Study setting        | 9   | Description of study settings (eg, community clinic, academic hospital) and list of countries where data will be collected. Reference to where list of study sites can be obtained             | 5  |
| Eligibility criteria | 10  | Inclusion and exclusion criteria for participants. If applicable, eligibility criteria for study centres and individuals who will perform the interventions (eg, surgeons, psychotherapists)   | 6  |
| Interventions        | 11a | Interventions for each group with sufficient detail to allow replication, including how and when they will be administered                                                                     | 4  |
|                      | 11b | Criteria for discontinuing or modifying allocated interventions for a given trial participant (eg, drug dose change in response to harms, participant request, or improving/worsening disease) | NA |

|    |                      |     |                                                                                                                                                                                                                                                                                                                                                                                |    |
|----|----------------------|-----|--------------------------------------------------------------------------------------------------------------------------------------------------------------------------------------------------------------------------------------------------------------------------------------------------------------------------------------------------------------------------------|----|
| 1  |                      |     |                                                                                                                                                                                                                                                                                                                                                                                |    |
| 2  |                      |     |                                                                                                                                                                                                                                                                                                                                                                                |    |
| 3  |                      |     |                                                                                                                                                                                                                                                                                                                                                                                |    |
| 4  |                      | 11c | Strategies to improve adherence to intervention protocols, and any procedures for monitoring adherence (eg, drug tablet return, laboratory tests)                                                                                                                                                                                                                              | NA |
| 5  |                      |     |                                                                                                                                                                                                                                                                                                                                                                                |    |
| 6  |                      |     |                                                                                                                                                                                                                                                                                                                                                                                |    |
| 7  |                      | 11d | Relevant concomitant care and interventions that are permitted or prohibited during the trial                                                                                                                                                                                                                                                                                  | 8  |
| 8  |                      |     |                                                                                                                                                                                                                                                                                                                                                                                |    |
| 9  | Outcomes             | 12  | Primary, secondary, and other outcomes, including the specific measurement variable (eg, systolic blood pressure), analysis metric (eg, change from baseline, final value, time to event), method of aggregation (eg, median, proportion), and time point for each outcome. Explanation of the clinical relevance of chosen efficacy and harm outcomes is strongly recommended | 9  |
| 10 |                      |     |                                                                                                                                                                                                                                                                                                                                                                                |    |
| 11 |                      |     |                                                                                                                                                                                                                                                                                                                                                                                |    |
| 12 |                      |     |                                                                                                                                                                                                                                                                                                                                                                                |    |
| 13 |                      |     |                                                                                                                                                                                                                                                                                                                                                                                |    |
| 14 |                      |     |                                                                                                                                                                                                                                                                                                                                                                                |    |
| 15 |                      |     |                                                                                                                                                                                                                                                                                                                                                                                |    |
| 16 | Participant timeline | 13  | Time schedule of enrolment, interventions (including any run-ins and washouts), assessments, and visits for participants. A schematic diagram is highly recommended (see Figure)                                                                                                                                                                                               | 14 |
| 17 |                      |     |                                                                                                                                                                                                                                                                                                                                                                                |    |
| 18 |                      |     |                                                                                                                                                                                                                                                                                                                                                                                |    |
| 19 |                      |     |                                                                                                                                                                                                                                                                                                                                                                                |    |
| 20 | Sample size          | 14  | Estimated number of participants needed to achieve study objectives and how it was determined, including clinical and statistical assumptions supporting any sample size calculations                                                                                                                                                                                          | 10 |
| 21 |                      |     |                                                                                                                                                                                                                                                                                                                                                                                |    |
| 22 |                      |     |                                                                                                                                                                                                                                                                                                                                                                                |    |
| 23 |                      |     |                                                                                                                                                                                                                                                                                                                                                                                |    |
| 24 |                      |     |                                                                                                                                                                                                                                                                                                                                                                                |    |
| 25 | Recruitment          | 15  | Strategies for achieving adequate participant enrolment to reach target sample size                                                                                                                                                                                                                                                                                            | NA |
| 26 |                      |     |                                                                                                                                                                                                                                                                                                                                                                                |    |
| 27 |                      |     |                                                                                                                                                                                                                                                                                                                                                                                |    |

### Methods: Assignment of interventions (for controlled trials)

#### Allocation:

|    |                     |     |                                                                                                                                                                                                                                                                                                                                                          |    |
|----|---------------------|-----|----------------------------------------------------------------------------------------------------------------------------------------------------------------------------------------------------------------------------------------------------------------------------------------------------------------------------------------------------------|----|
| 31 |                     |     |                                                                                                                                                                                                                                                                                                                                                          |    |
| 32 | Sequence generation | 16a | Method of generating the allocation sequence (eg, computer-generated random numbers), and list of any factors for stratification. To reduce predictability of a random sequence, details of any planned restriction (eg, blocking) should be provided in a separate document that is unavailable to those who enrol participants or assign interventions | 10 |
| 33 |                     |     |                                                                                                                                                                                                                                                                                                                                                          |    |
| 34 |                     |     |                                                                                                                                                                                                                                                                                                                                                          |    |
| 35 |                     |     |                                                                                                                                                                                                                                                                                                                                                          |    |
| 36 |                     |     |                                                                                                                                                                                                                                                                                                                                                          |    |
| 37 |                     |     |                                                                                                                                                                                                                                                                                                                                                          |    |
| 38 |                     |     |                                                                                                                                                                                                                                                                                                                                                          |    |
| 39 |                     |     |                                                                                                                                                                                                                                                                                                                                                          |    |
| 40 |                     |     |                                                                                                                                                                                                                                                                                                                                                          |    |
| 41 |                     |     |                                                                                                                                                                                                                                                                                                                                                          |    |
| 42 |                     |     |                                                                                                                                                                                                                                                                                                                                                          |    |

1  
2  
3  
4  
5  
6  
7  
8  
9  
10  
11  
12  
13  
14  
15  
16  
17  
18  
19  
20  
21  
22  
23  
24  
25  
26  
27  
28  
29  
30  
31  
32  
33  
34  
35  
36  
37  
38  
39  
40  
41  
42  
43  
44  
45  
46

|                                                           |     |                                                                                                                                                                                                                                                                                                                                                                                                              |       |
|-----------------------------------------------------------|-----|--------------------------------------------------------------------------------------------------------------------------------------------------------------------------------------------------------------------------------------------------------------------------------------------------------------------------------------------------------------------------------------------------------------|-------|
| Allocation concealment mechanism                          | 16b | Mechanism of implementing the allocation sequence (eg, central telephone; sequentially numbered, opaque, sealed envelopes), describing any steps to conceal the sequence until interventions are assigned                                                                                                                                                                                                    | 10    |
| Implementation                                            | 16c | Who will generate the allocation sequence, who will enrol participants, and who will assign participants to interventions                                                                                                                                                                                                                                                                                    | 10    |
| Blinding (masking)                                        | 17a | Who will be blinded after assignment to interventions (eg, trial participants, care providers, outcome assessors, data analysts), and how                                                                                                                                                                                                                                                                    | NA    |
|                                                           | 17b | If blinded, circumstances under which unblinding is permissible, and procedure for revealing a participant’s allocated intervention during the trial                                                                                                                                                                                                                                                         | NA    |
| <b>Methods: Data collection, management, and analysis</b> |     |                                                                                                                                                                                                                                                                                                                                                                                                              |       |
| Data collection methods                                   | 18a | Plans for assessment and collection of outcome, baseline, and other trial data, including any related processes to promote data quality (eg, duplicate measurements, training of assessors) and a description of study instruments (eg, questionnaires, laboratory tests) along with their reliability and validity, if known. Reference to where data collection forms can be found, if not in the protocol | 9, 10 |
|                                                           | 18b | Plans to promote participant retention and complete follow-up, including list of any outcome data to be collected for participants who discontinue or deviate from intervention protocols                                                                                                                                                                                                                    | 9, 10 |
| Data management                                           | 19  | Plans for data entry, coding, security, and storage, including any related processes to promote data quality (eg, double data entry; range checks for data values). Reference to where details of data management procedures can be found, if not in the protocol                                                                                                                                            | 12    |
| Statistical methods                                       | 20a | Statistical methods for analysing primary and secondary outcomes. Reference to where other details of the statistical analysis plan can be found, if not in the protocol                                                                                                                                                                                                                                     | 11    |
|                                                           | 20b | Methods for any additional analyses (eg, subgroup and adjusted analyses)                                                                                                                                                                                                                                                                                                                                     | NA    |

1  
2  
3  
4  
5  
6  
7  
8  
9  
10  
11  
12  
13  
14  
15  
16  
17  
18  
19  
20  
21  
22  
23  
24  
25  
26  
27  
28  
29  
30  
31  
32  
33  
34  
35  
36  
37  
38  
39  
40  
41  
42  
43  
44  
45  
46

20c Definition of analysis population relating to protocol non-adherence (eg, as randomised analysis), and any statistical methods to handle missing data (eg, multiple imputation) 11

### Methods: Monitoring

Data monitoring 21a Composition of data monitoring committee (DMC); summary of its role and reporting structure; statement of whether it is independent from the sponsor and competing interests; and reference to where further details about its charter can be found, if not in the protocol. Alternatively, an explanation of why a DMC is not needed NA

21b Description of any interim analyses and stopping guidelines, including who will have access to these interim results and make the final decision to terminate the trial 13

Harms 22 Plans for collecting, assessing, reporting, and managing solicited and spontaneously reported adverse events and other unintended effects of trial interventions or trial conduct 13

Auditing 23 Frequency and procedures for auditing trial conduct, if any, and whether the process will be independent from investigators and the sponsor NA

### Ethics and dissemination

Research ethics approval 24 Plans for seeking research ethics committee/institutional review board (REC/IRB) approval 17

Protocol amendments 25 Plans for communicating important protocol modifications (eg, changes to eligibility criteria, outcomes, analyses) to relevant parties (eg, investigators, REC/IRBs, trial participants, trial registries, journals, regulators) 17

Consent or assent 26a Who will obtain informed consent or assent from potential trial participants or authorised surrogates, and how (see Item 32) 12

26b Additional consent provisions for collection and use of participant data and biological specimens in ancillary studies, if applicable NA

|    |                               |     |                                                                                                                                                                                                                                                                                     |    |
|----|-------------------------------|-----|-------------------------------------------------------------------------------------------------------------------------------------------------------------------------------------------------------------------------------------------------------------------------------------|----|
| 1  |                               |     |                                                                                                                                                                                                                                                                                     |    |
| 2  |                               |     |                                                                                                                                                                                                                                                                                     |    |
| 3  |                               |     |                                                                                                                                                                                                                                                                                     |    |
| 4  | Confidentiality               | 27  | How personal information about potential and enrolled participants will be collected, shared, and maintained in order to protect confidentiality before, during, and after the trial                                                                                                | 12 |
| 5  |                               |     |                                                                                                                                                                                                                                                                                     |    |
| 6  |                               |     |                                                                                                                                                                                                                                                                                     |    |
| 7  | Declaration of interests      | 28  | Financial and other competing interests for principal investigators for the overall trial and each study site                                                                                                                                                                       | 17 |
| 8  |                               |     |                                                                                                                                                                                                                                                                                     |    |
| 9  |                               |     |                                                                                                                                                                                                                                                                                     |    |
| 10 | Access to data                | 29  | Statement of who will have access to the final trial dataset, and disclosure of contractual agreements that limit such access for investigators                                                                                                                                     | 17 |
| 11 |                               |     |                                                                                                                                                                                                                                                                                     |    |
| 12 |                               |     |                                                                                                                                                                                                                                                                                     |    |
| 13 | Ancillary and post-trial care | 30  | Provisions, if any, for ancillary and post-trial care, and for compensation to those who suffer harm from trial participation                                                                                                                                                       | NA |
| 14 |                               |     |                                                                                                                                                                                                                                                                                     |    |
| 15 |                               |     |                                                                                                                                                                                                                                                                                     |    |
| 16 | Dissemination policy          | 31a | Plans for investigators and sponsor to communicate trial results to participants, healthcare professionals, the public, and other relevant groups (eg, via publication, reporting in results databases, or other data sharing arrangements), including any publication restrictions | 13 |
| 17 |                               |     |                                                                                                                                                                                                                                                                                     |    |
| 18 |                               |     |                                                                                                                                                                                                                                                                                     |    |
| 19 |                               |     |                                                                                                                                                                                                                                                                                     |    |
| 20 |                               |     |                                                                                                                                                                                                                                                                                     |    |
| 21 |                               | 31b | Authorship eligibility guidelines and any intended use of professional writers                                                                                                                                                                                                      | NA |
| 22 |                               |     |                                                                                                                                                                                                                                                                                     |    |
| 23 |                               | 31c | Plans, if any, for granting public access to the full protocol, participant-level dataset, and statistical code                                                                                                                                                                     | 13 |
| 24 |                               |     |                                                                                                                                                                                                                                                                                     |    |
| 25 |                               |     |                                                                                                                                                                                                                                                                                     |    |
| 26 |                               |     |                                                                                                                                                                                                                                                                                     |    |
| 27 | <b>Appendices</b>             |     |                                                                                                                                                                                                                                                                                     |    |
| 28 | Informed consent materials    | 32  | Model consent form and other related documentation given to participants and authorised surrogates                                                                                                                                                                                  | NA |
| 29 |                               |     |                                                                                                                                                                                                                                                                                     |    |
| 30 |                               |     |                                                                                                                                                                                                                                                                                     |    |
| 31 | Biological specimens          | 33  | Plans for collection, laboratory evaluation, and storage of biological specimens for genetic or molecular analysis in the current trial and for future use in ancillary studies, if applicable                                                                                      | NA |
| 32 |                               |     |                                                                                                                                                                                                                                                                                     |    |
| 33 |                               |     |                                                                                                                                                                                                                                                                                     |    |
| 34 |                               |     |                                                                                                                                                                                                                                                                                     |    |
| 35 |                               |     |                                                                                                                                                                                                                                                                                     |    |
| 36 |                               |     |                                                                                                                                                                                                                                                                                     |    |
| 37 |                               |     |                                                                                                                                                                                                                                                                                     |    |
| 38 |                               |     |                                                                                                                                                                                                                                                                                     |    |
| 39 |                               |     |                                                                                                                                                                                                                                                                                     |    |
| 40 |                               |     |                                                                                                                                                                                                                                                                                     |    |
| 41 |                               |     |                                                                                                                                                                                                                                                                                     |    |
| 42 |                               |     |                                                                                                                                                                                                                                                                                     |    |
| 43 |                               |     |                                                                                                                                                                                                                                                                                     |    |
| 44 |                               |     |                                                                                                                                                                                                                                                                                     |    |
| 45 |                               |     |                                                                                                                                                                                                                                                                                     |    |
| 46 |                               |     |                                                                                                                                                                                                                                                                                     |    |
