# Supplementary material for: Prospective, randomised, multicentre, open-label trial, designed to evaluate the best timing of closure of the temporary ileostomy (early versus late) in patients who underwent rectal cancer resection and with indication for adjuvant chemotherapy: the STOMAD (STOMa closure before or after ADjuvant therapy) randomised controlled trial
Source: PubMed Central journal article supplement — BMJ Open. 2021 Feb 19;11(2):e044692. doi: 10.1136/bmjopen-2020-044692 (PMC7896613; doi:10.1136/bmjopen-2020-044692), 2021-02-19
Supplement: bmjopen-2020-044692supp001.pdf [file bmjopen-2020-044692supp001.pdf]

Su carta intestata del centro partecipante

## **FOGLIO INFORMATIVO E MODULO DI CONSENSO INFORMATO PER IL PAZIENTE**

**Studio prospettico randomizzato sul timing di chiusura dell'ileostomia temporanea nei pazienti operati per neoplasia rettale e con indicazione a chemioterapia adiuvante.**

**The STOMa closure before or after ADJuvant therapy trial - STOMAD TRIAL**

Gentile Signore/a,

Le è stato chiesto di partecipare ad una sperimentazione clinica, promossa dalla Rete Oncologica Piemonte e Valle d'Aosta.

I ricercatori studiano i casi come il suo, al fine di migliorare i metodi diagnostici, le terapie e la cura. Questo tipo di approccio si definisce ricerca clinica.

Prima di dare il Suo consenso a partecipare a questo studio, è bene che Lei sia a conoscenza dei rischi e dei benefici ad esso correlati. La Sua partecipazione a questa ricerca è assolutamente volontaria e Le sarà concesso il tempo sufficiente per decidere se partecipare. Questo processo è noto con il nome di consenso informato.

Nelle pagine seguenti, troverà i dettagli della sperimentazione clinica, di cui potrà discutere con il Suo medico. Le raccomandiamo di leggere queste informazioni con attenzione. Se c'è qualcosa che non capisce o di cui desidererebbe sapere di più, non esiti a chiederlo.

Prima di decidere di partecipare, Le consigliamo di parlarne con un familiare, un amico o il Suo medico di medicina generale.

Quando avrà compreso la natura dello studio clinico e se desidera parteciparvi, Le chiederemo di firmare il modulo per il consenso informato del paziente. Le sarà consegnata una copia del presente foglio informativo e del modulo per il consenso informato del paziente, che Le consigliamo di conservare.

### **Finalità della ricerca e Descrizione della sperimentazione clinica**

La invitiamo a prendere parte a questo studio in quanto Le è stato diagnosticato un tumore rettale, per il quale è stato trattato con un intervento chirurgico di resezione rettale con confezione di una ileostomia.

Nei pazienti che, come lei, devono essere sottoposti a successiva chemioterapia adiuvante, l'attuale prassi prevede la chiusura della stomia dopo il termine del trattamento farmacologico, il che avviene in genere dopo almeno 3 mesi dall'intervento.

E' stato rilevato però che la presenza prolungata della stomia può favorire l'insorgenza di complicanze che potrebbero richiedere anche un secondo ricovero. La presenza della stomia inoltre incide sulla qualità di vita imponendo cambiamenti importanti nella routine quotidiana, nello stile di vita e nella sfera sessuale.

### Su carta intestata del centro partecipante

Alcuni studi hanno dimostrato che la chiusura precoce dell'ileostomia è altrettanto sicura rispetto alla chiusura tardiva e quindi preferibile sia dal punto di vista del paziente che per quanto riguarda la spesa sanitaria.

Non è tuttavia ancora noto quale sia il momento migliore per chiudere la stomia in relazione alla tollerabilità della chemioterapia.

Per dirimere tale quesito, questo studio prevede di coinvolgere i pazienti operati per tumore del retto nei centri della Rete Oncologica Piemonte e Valle d'Aosta. Lo studio prevede per metà dei partecipanti la chiusura della stomia a 30-40 giorni dall'intervento (gruppo di studio) e per l'altra metà a circa 15 gg dal termine della terapia adiuvante (gruppo di controllo).

L'assegnazione dei pazienti ad un gruppo o all'altro non è a discrezione degli sperimentatori, ma avviene attraverso un meccanismo computerizzato casuale chiamato randomizzazione.

Il presente studio clinico è condotto ai sensi del diritto nazionale applicabile e delle linee guida internazionali, ed è stato approvato dal Comitato Etico del centro coordinatore (AO Ordine Mauriziano - Torino), nonché dal Comitato Etico Indipendente del Suo centro.

### **Sono tenuto a prendere parte a questo progetto di ricerca?**

La Sua partecipazione a questo studio di ricerca è assolutamente volontaria. Se dovesse decidere di non partecipare, non ci sarà alcuna ripercussione sulla sua assistenza medica. Qualora cominciasse lo studio, avrà la possibilità di ritirarsi in qualsiasi momento e senza doverne specificare la ragione. Questa decisione non influirà in alcun modo sull'assistenza medica futura.

Qualora si dovesse ritirare dallo studio, solo i dati già raccolti saranno usati ai fini dell'analisi. Qualora dovesse ritirare il consenso ma dare la Sua approvazione, il Suo medico di riferimento per lo studio potrà raccogliere informazioni sul Suo stato di salute da fonti disponibili quali ad esempio cartelle cliniche o registri pubblici.

### **Quali sono le alternative alla mia partecipazione?**

Qualora Lei decidesse di non prendere parte al presente studio, lei verrà trattato secondo la attuale pratica clinica che prevede la chiusura della stomia al termine della chemioterapia adiuvante.

### **Procedure**

Una volta firmato il modulo di consenso informato il medico svolgerà le opportune valutazioni per assicurarsi della Sua idoneità alla partecipazione allo studio. All'atto dell'arruolamento le sarà chiesto di compilare un Questionario atto a valutare la qualità di vita (QoL).

Il personale le chiederà di compilare dei questionari simili in altri due diversi momenti del percorso di cura:

Su carta intestata del centro partecipante

- al quarto ciclo del programma di chemioterapia;
- dopo circa 12 mesi dall'intervento.

### **Visite ed esami previsti nel corso della terapia di studio**

Dal momento che la Sua partecipazione allo studio si inserisce nella cura della Sua problematica clinica, le visite e gli esami previsti fanno parte del normale approccio terapeutico garantito dal suo ospedale.

### **Quali sono i possibili benefici della partecipazione allo studio?**

Ad oggi non è possibile sapere quale sia il momento migliore per la chiusura della stomia, quindi non è certo che questo studio possa darLe un beneficio diretto. Questa ricerca però, aiuterà i ricercatori a comprendere la migliore strategia di trattamento chirurgico per aiutare altri pazienti con la Sua stessa malattia in futuro.

### **Quali sono i possibili rischi legati alla partecipazione allo studio?**

Lo studio non comporta rischi aggiuntivi rispetto alla corrente pratica clinica per i pazienti che rientreranno nel gruppo di studio, in quanto trattasi di tecnica chirurgica comunemente utilizzata.

### **Qual è il costo per la partecipazione allo studio?**

Tutte le spese, ad esempio gli esami standard di routine, saranno gestiti come se Lei stesse ricevendo un'assistenza medica normale, senza partecipare ad alcun studio clinico. Non Le saranno addebitati costi aggiuntivi. La partecipazione al presente studio non è retribuita.

### **Che cosa succederà alle informazioni che mi riguardano?**

I ricercatori dovranno raccogliere informazioni personali quali l'età, il sesso e le altre informazioni mediche richieste. Tutte le informazioni relative alla raccolta dei Suoi dati personali saranno cifrate in modo tale che senza una chiave non sarà possibile farle risalire alla persona interessata.

Qualsiasi informazione personale o medica raccolta sarà strettamente privata e riservata. La conservazione delle informazioni avverrà in modo sicuro. Solo le persone autorizzate potranno accedervi, in quanto perfettamente al corrente della loro natura strettamente riservata. Né il Suo nome né qualsiasi altra informazione identificativa compariranno in alcun rapporto di studio reso disponibile al pubblico.

I rappresentanti del promotore dello studio (Rete Oncologica Piemonte e Valle d'Aosta), le agenzie per i farmaci o i Comitati Etici potranno richiedere l'accesso alle informazioni personali o mediche contenute nella Sua cartella clinica, al fine di verificare le procedure e/o i dati di studio. In caso di sinistri relativi a problemi o danni

## Su carta intestata del centro partecipante

medici, anche i rappresentanti dell'assicurazione avranno accesso ai Suoi dati medici attraverso il Suo ricercatore e solo nella misura necessaria per la gestione del sinistro. Il promotore dello studio garantisce il rispetto delle linee guida nazionali e internazionali sulla protezione dei dati.

I Suoi dati personali saranno trattati, nei limiti e con le modalità indicate nel presente documento e in conformità al Codice in Materia di Protezione dei Dati Personali (D.Lgs 196 del 30/06/2003) e al Regolamento (UE) 2016/679 sulla protezione dei dati personali (GDPR).

**Cosa succederebbe se dovessero sorgere nuove informazioni durante lo studio?**

Lei ha il diritto di essere informato dei progressi dello studio di ricerca e dei suoi risultati finali. Inoltre, ha il diritto di essere informato riguardo a eventuali altri risultati di altri studi che potrebbero rivelarsi importanti per il Suo trattamento o influire sulla Sua disponibilità a proseguire questo studio.

**A chi devo rivolgermi in caso di dubbi?**

Se ha bisogno di ulteriori informazioni su questo studio prima di decidere di parteciparvi, si rivolga al Suo medico di riferimento per lo studio. Qualora dovesse decidere di partecipare, si rivolga allo stesso medico di riferimento qualora si verificassero gravi effetti indesiderati causati dalla terapia.

Responsabile locale per lo studio – Dott: .....

Recapito: .....

Su carta intestata del centro partecipante

**CONSENSO INFORMATO DEL PAZIENTE ALLA PARTECIPAZIONE ALLA  
SPERIMENTAZIONE CLINICA**

**Studio prospettico randomizzato sul timing di chiusura dell'ileostomia temporanea nei pazienti operati per neoplasia rettale e con indicazione a chemioterapia adiuvante.**

**The stoma closure before or after adjuvant therapy trial - STOMAD TRIAL**

**DICHIARAZIONE DEL PAZIENTE**

Con la firma sottostante attesto che:

- Il medico citato di seguito mi ha spiegato oralmente e per iscritto gli obiettivi, la procedura dello studio, gli effetti attesi, i possibili vantaggi e svantaggi e i potenziali rischi. Se desidero ulteriori informazioni su questo studio, posso rivolgermi al medico dello studio.
- Ho letto e compreso il modulo di informazioni per i pazienti prodotto per questo studio. Le mie domande relative alla partecipazione allo studio hanno ricevuto una risposta soddisfacente. Posso conservare il modulo informativo e riceverò una copia del mio consenso informato firmato.
- Ho avuto tempo a sufficienza per prendere la mia decisione.
- La mia partecipazione a questo studio è volontaria. Posso ritirare la mia partecipazione in ogni momento senza addurre alcuna motivazione e senza nessuna ripercussione sulla prosecuzione dell'assistenza medica.
- Riceverò una copia del modulo di informazione del paziente e una copia del modulo di consenso firmato.

NOME E COGNOME \_\_\_\_\_

FIRMA \_\_\_\_\_ DATA: \_\_\_\_\_

Su carta intestata del centro partecipante

**TESTIMONE IMPARZIALE (Solo nel caso in cui il paziente non sia in grado di leggere o scrivere) – Compilare solo se applicabile**

Confermo di non essere in relazione con lo studio, di aver partecipato al processo del consenso e di aver letto le informazioni dello studio.

NOME E COGNOME

DEL TESTIMONE IMPARZIALE: \_\_\_\_\_

FIRMA

DEL TESTIMONE IMPARZIALE: \_\_\_\_\_ DATA: \_\_\_\_\_

**DICHIARAZIONE DEL MEDICO RICHIEDENTE IL CONSENSO INFORMATO**

Dichiaro di aver spiegato in modo esauriente il presente studio al paziente.

A mio giudizio e secondo il paziente le informazioni fornite, anche riguardo a rischi e benefici, sono state sufficienti per una decisione informata.

NOME E COGNOME DEL MEDICO CHE HA OTTENUTO IL CONSENSO:

\_\_\_\_\_

FIRMA DEL MEDICO CHE HA OTTENUTO IL CONSENSO:

\_\_\_\_\_

\_\_\_\_\_

DATA: \_\_\_\_\_
